# Supplementary material for: Reversal of hyperactive higher-order thalamus attenuates defensiveness in a mouse model of PTSD
Source: PubMed Central journal article supplement — Sci Adv. 2023 Feb 3;9(5):eade5987. doi: 10.1126/sciadv.ade5987 (PMC9897664; doi:10.1126/sciadv.ade5987), 2023-02-03
Supplement: sciadv.ade5987_sm.v2.pdf [file sciadv.ade5987_sm.v2.pdf]

Supplementary Materials for  
**Reversal of hyperactive higher-order thalamus attenuates defensiveness in a mouse model of PTSD**

Kaiwen Xi *et al.*

Corresponding author: Baolin Guo, baolguo@fmmu.edu.cn; Shengxi Wu, shengxi@fmmu.edu.cn

*Sci. Adv.* **9**, eade5987 (2023)  
DOI: 10.1126/sciadv.ade5987

**The PDF file includes:**

Figs. S1 to S18  
Tables S1 to S3

**Other Supplementary Material for this manuscript includes the following:**

Movie S1

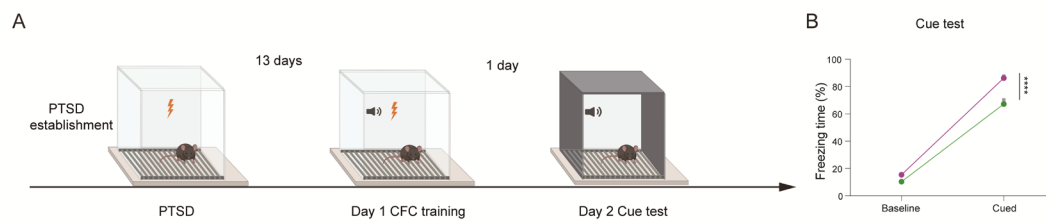

**Fig. S1. Excessive defensive behavior in PTSD mice caused by auditory stimulation. (A)** Diagram of Day 2 cue test. **(B)** Elevated freezing time on Day 2 cue test in PTSD mice (n = 10 mice for each group). \*\*\*\* $P < 0.0001$ , by Two-way ANOVA. Data are presented as the mean  $\pm$  S.E.M. See Table S1 for detailed statistical information.

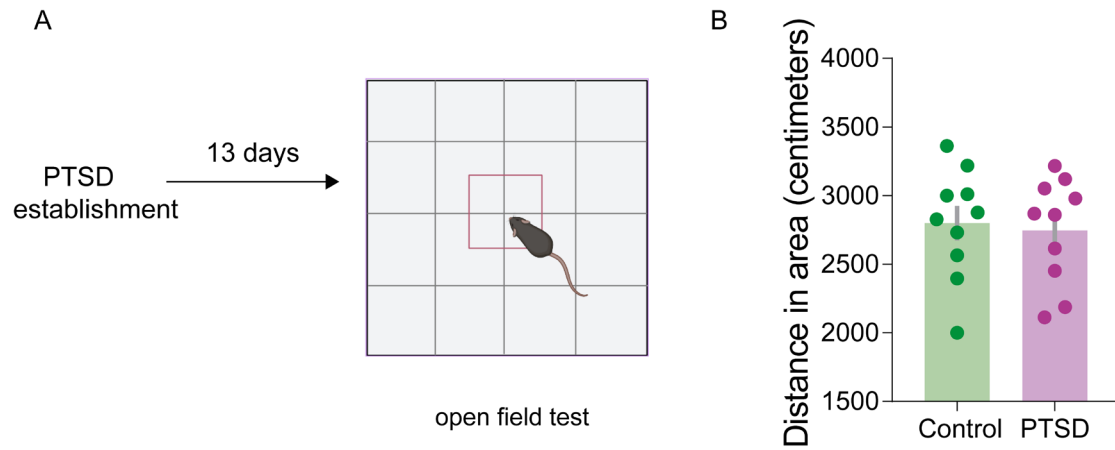

**Fig. S2. PTSD stress did not influence the locomotor activity.** (A) Diagram of the open field test 13 days after the PTSD establishment. (B) Histogram of the distance in the open field between control and PTSD mice (n = 10 mice for each group). By Two-tailed unpaired t-test. Data are presented as the mean  $\pm$  S.E.M. See Table S1 for detailed statistical information.

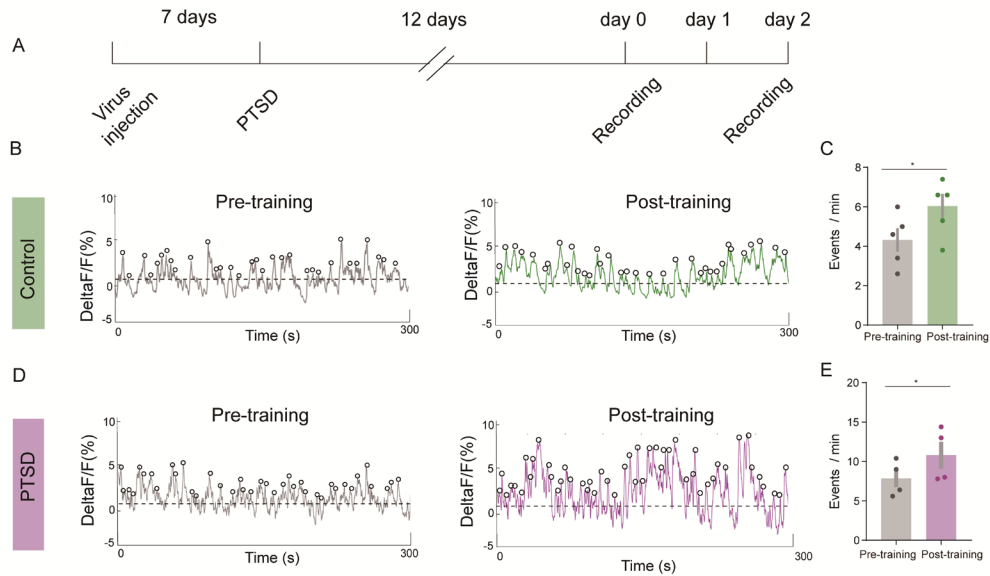

**Fig. S3. Increased neuronal activity of PoM following CFC training.** (A) Schematic of fiber photometry. (B) Schematic and representative traces of tests of fiber photometry in PoM of control mice were subjected to environmental stimulation on the day before training and 2<sup>nd</sup> day after training. (C) Frequency of spontaneous calcium events in PoM of control mice on the day before and 2<sup>nd</sup> day after training (n = 5 mice for control group). \**P* < 0.05, by Two-tailed paired t-test. (D) Schematic and representative traces of tests of fiber photometry in PoM when PTSD mice were subjected to environmental stimulation on the day before and 2<sup>nd</sup> day after training. (E) Frequency of spontaneous calcium events in PoM of PTSD mice on the day before training and 2<sup>nd</sup> day after training (n = 4 mice for PTSD group). \**P* < 0.05, by Two-tailed paired t-test. Data are presented as the mean ± S.E.M. See Table S1 for detailed statistical information.

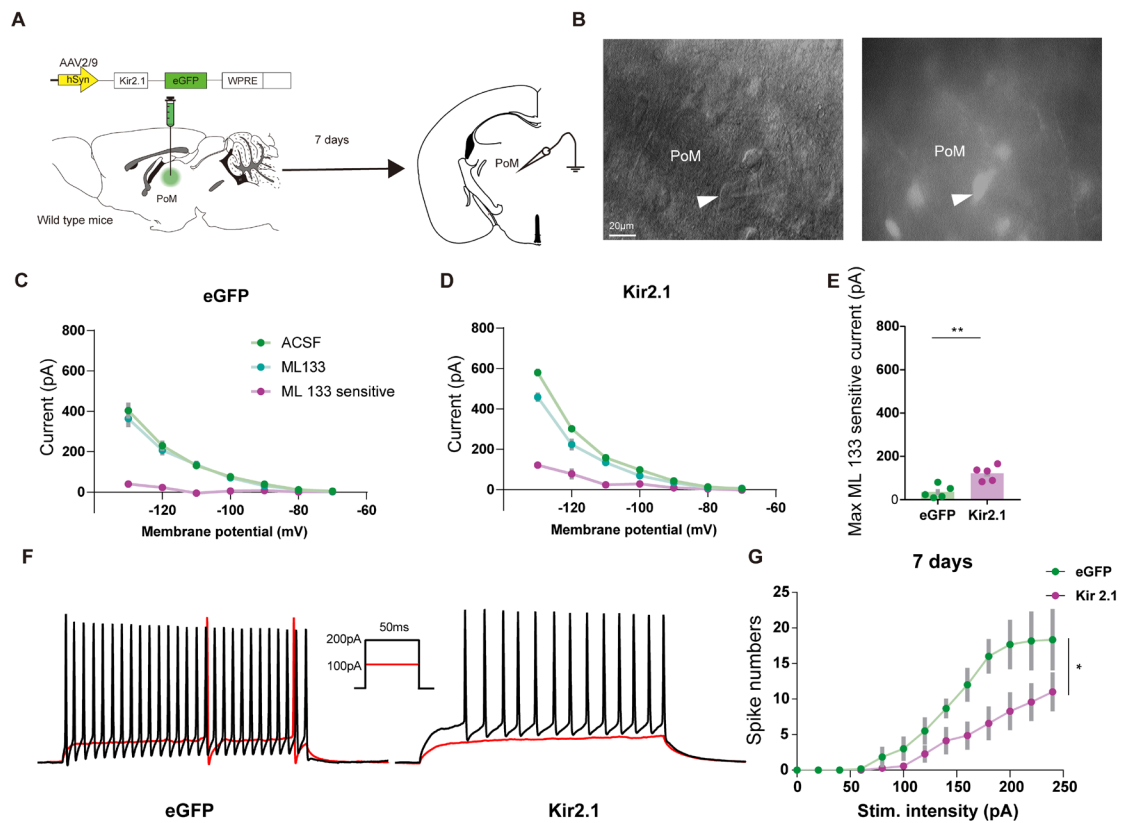

**Fig. S4. Kir2.1 overexpression reduced the excitability of PoM neurons.** (A) Schematic of virus injection and patch clamp recordings. (B) Representative images of patch clamp recordings of PoM neurons with Kir2.1 overexpression. Scale bar: 20µm. Left: Patch clamp recording of the PoM neuron in DIC microscope. Right: Fluorescence of neurons. (C-D) ML 133 sensitive currents in eGFP-expressing (C) and Kir2.1-expressing mice (D) 7 days after virus injection. (E) Max ML133 sensitive current in eGFP-expressing and Kir2.1-expressing mice after 7 days virus expression. (n = 5 neurons for eGFP group, n = 5 neurons for Kir2.1 group). \*\* $P < 0.01$ , by Two-tailed unpaired t-test. (F) Representative action potentials of PoM neurons in eGFP-expressing and Kir2.1-expressing mice after 7-day virus expression. (G) Numbers of spikes of eGFP-expressing and Kir2.1-expressing neurons after 7-day virus expression. (n = 6 neurons for eGFP group, n = 7 neurons for Kir2.1 group). \* $P < 0.05$ , by Two-way ANOVA. Data are presented as the mean  $\pm$  S.E.M. See Table S1 for detailed statistical information.

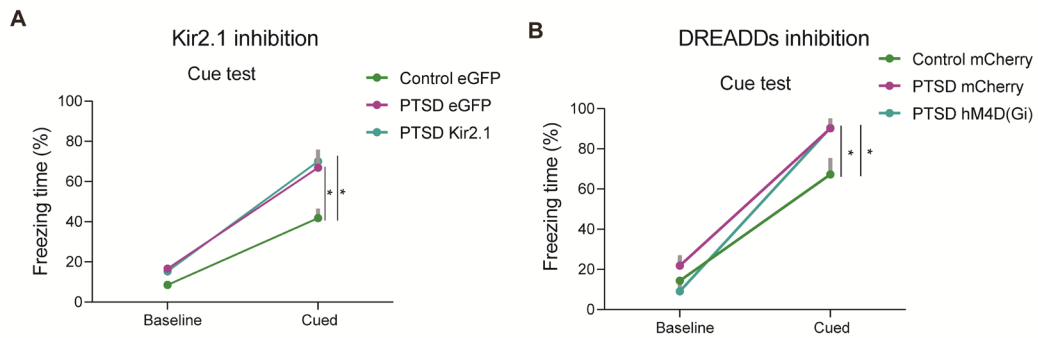

**Fig. S5. Failure of PoM inhibition to correct auditory-related defensive response in PTSD mice.** (A) Freezing time in day 2 cue test between eGFP-expressing control mice, eGFP-expressing PTSD mice and Kir2.1-expressing PTSD mice (n = 7 mice for control eGFP group, n = 6 mice for PTSD eGFP group and n = 7 mice for PTSD Kir2.1 group). \* $P < 0.05$ , by Two-way ANOVA. (B) Freezing time in day 2 cue test between mCherry-expressing control mice, mCherry-expressing PTSD mice and hM4D(Gi)-expressing PTSD mice (n = 9 mice for control mCherry group, n = 5 mice for PTSD mCherry group and n = 5 mice for PTSD hM4D(Gi) group). \* $P < 0.05$ , by Two-way ANOVA. Data are presented as the mean  $\pm$  S.E.M. See Table S1 for detailed statistical information.

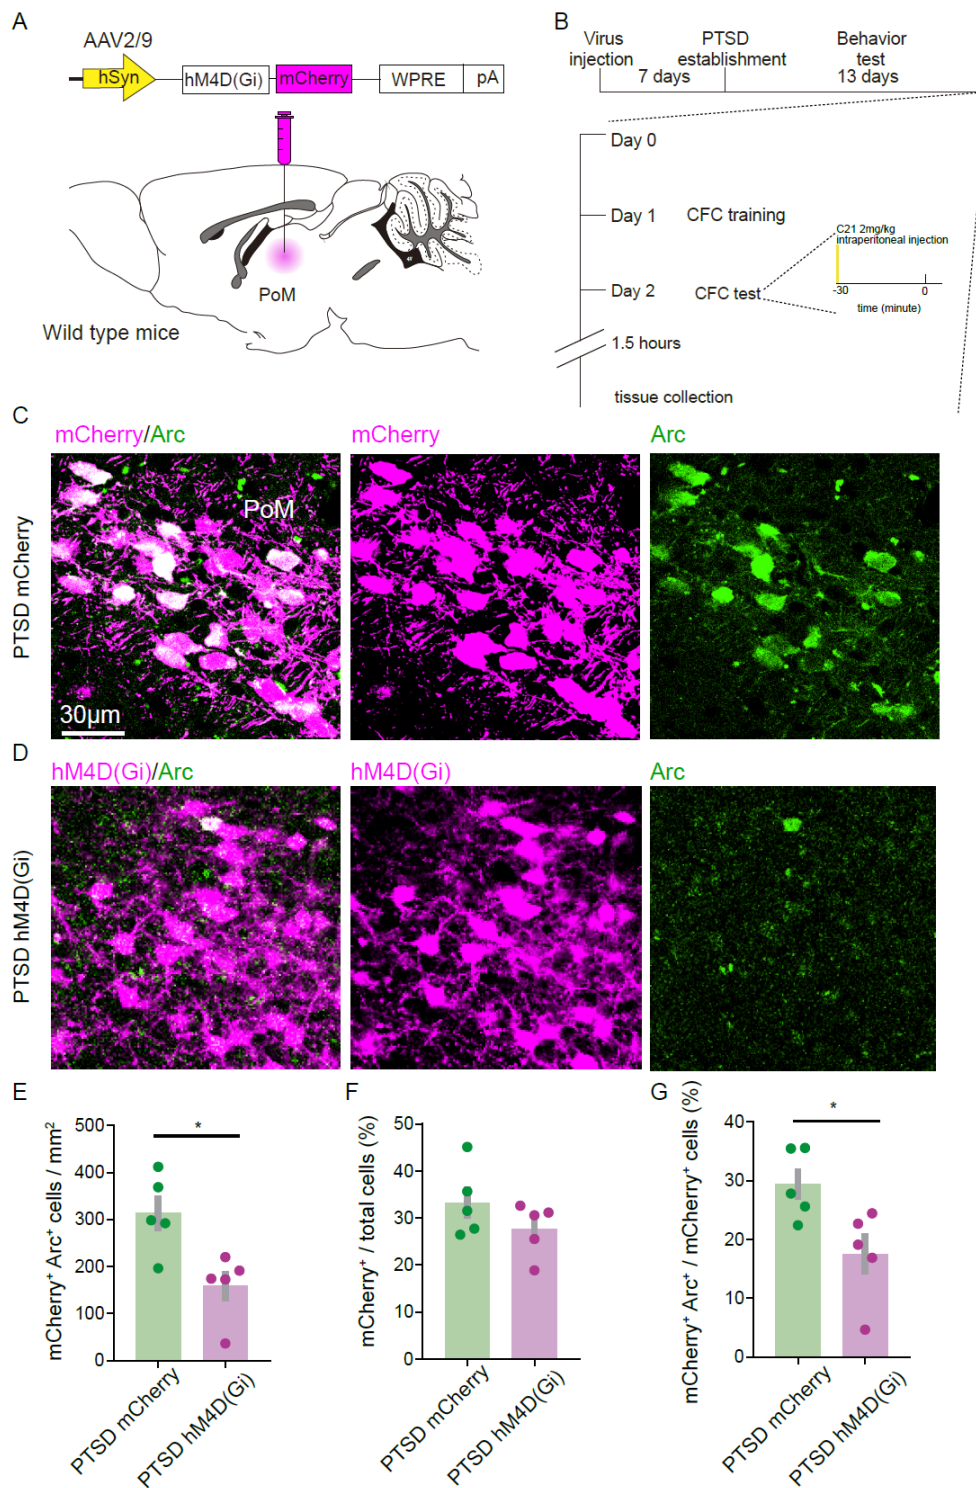

**Fig. S6. hM4D(Gi) suppressed Arc expression in PoM neurons in PTSD mice.** (A) Schematic of the viral strategy to chemo-genetically inhibit PoM neurons. (B) Schematic of behavioral tests and immunohistochemical fluorescence staining. (C) Representative images showing mCherry expression and Arc expression in PoM. Scale bar: 30µm. (D) Representative images showing

hM4D(Gi)-mCherry expression and Arc expression in PoM. Scale bar: 30 $\mu$ m. **(E)** Quantification of mCherry<sup>+</sup> Arc<sup>+</sup> cells in PoM (n = 5 mice for each group). \**P* < 0.05, by Two-tailed unpaired t-test. **(F)** Percentage of mCherry<sup>+</sup> cells in total cells of PoM (n = 5 mice for each group), by Two-tailed unpaired t-test. **(G)** Percentage of mCherry<sup>+</sup> Arc<sup>+</sup> cells in mCherry<sup>+</sup> cells (n = 5 mice for each group). \**P* < 0.05, by Two-tailed unpaired t-test. Data are presented as the mean  $\pm$  S.E.M. See Table S1 for detailed statistical information.



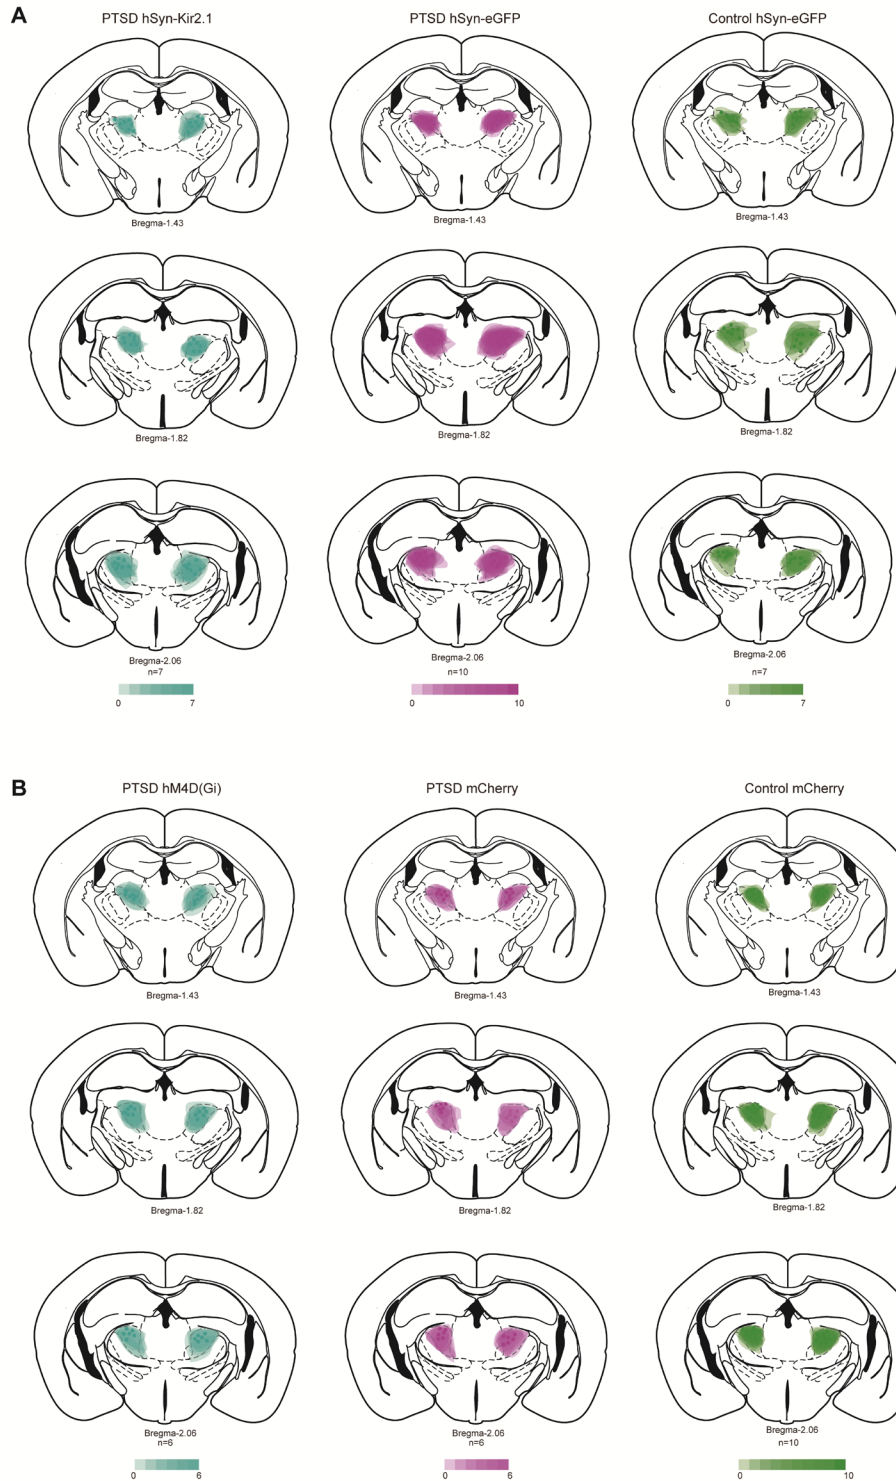

**Fig. S7. Verification of the region showing virus infection for PoM inhibition. (A) Schematic showing areas expressing Kir2.1 or eGFP in PoM. (B) Schematic showing areas expressing hM4D(Gi) or mCherry in PoM.**

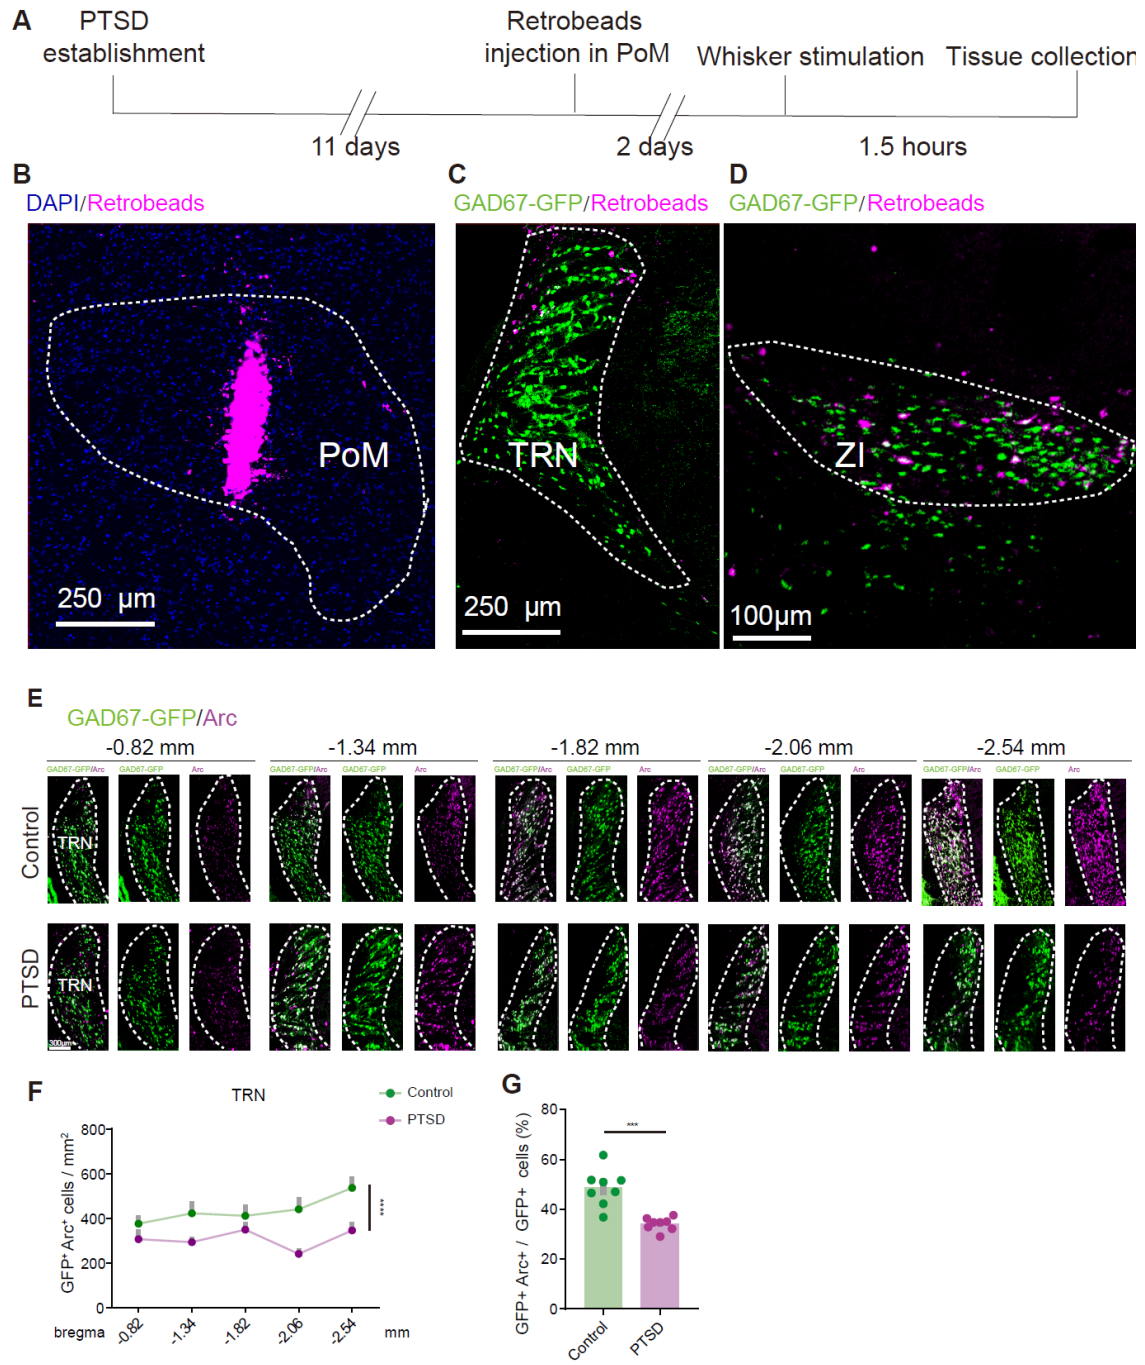

**Fig. S8. Reduced Arc expression in TRN in PTSD mice.** (A) Schematic for retrobeads injection in PoM and tissue collection strategy. (B) Representative images of injection sites in PoM. Scale bar: 250 $\mu$ m. (C) Representative images of GAD67-GFP and retrobeads in TRN. Scale bar: 250 $\mu$ m. (D) Representative images of GAD67-GFP and retrobeads in ZI. Scale bar: 100 $\mu$ m. (E) Representative images of GAD67 and Arc in TRN along the anterior (A) to posterior (P) axis between control and PTSD mice. Scale bar: 300 $\mu$ m. (F) The number of GFP<sup>+</sup> Arc<sup>+</sup> cells in TRN along the anterior (A) to posterior (P) axis between control and PTSD mice (n = 8 mice for each

group). \*\*\*\* $P < 0.0001$ , by Friedman's M test. (G) Percentage of GFP<sup>+</sup> Arc<sup>+</sup> cells in GFP<sup>+</sup> cells in TRN in control and PTSD mice (n=8 mice for each group). \*\*\* $P < 0.001$ , by Two-tailed unpaired t-test. Data are presented as the mean  $\pm$  S.E.M. See Table S1 for detailed statistical information.

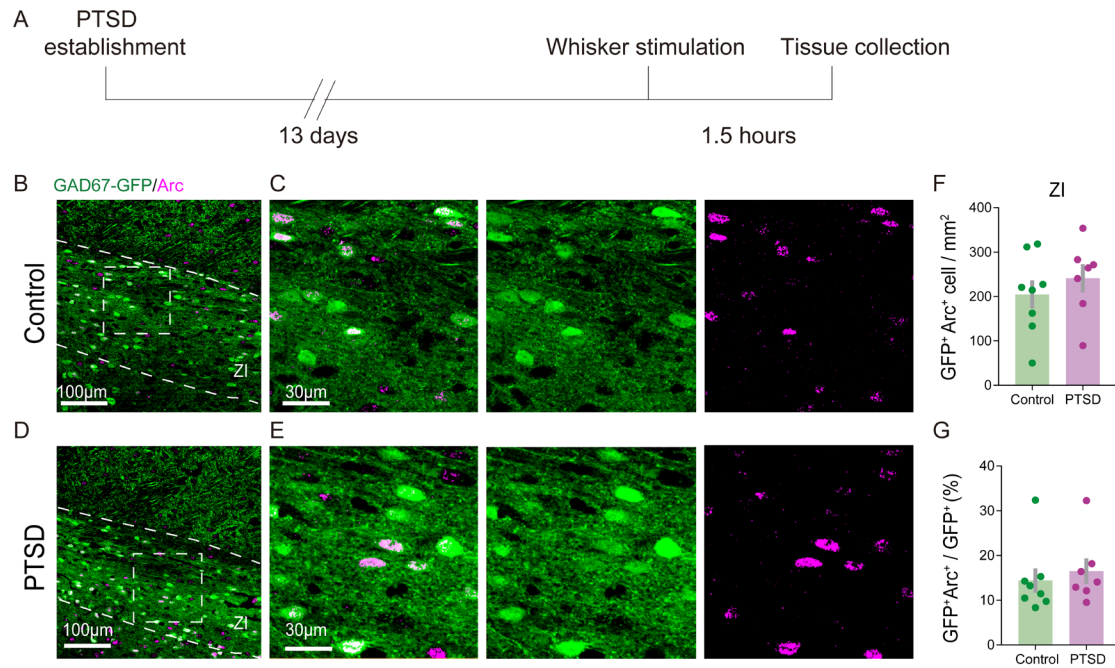

**Fig. S9. Intact Arc expression in ZI in PTSD mice.** (A) Schematic for tissue collection. (B-C) Representative images of GAD67 and Arc in ZI in control mice. Scale bar: 100  $\mu\text{m}$  and 30  $\mu\text{m}$ . (D-E) Representative images of GAD67 and Arc in ZI in PTSD mice. Scale bar: 100  $\mu\text{m}$  and 30  $\mu\text{m}$ . (F) The number of GFP<sup>+</sup> Arc<sup>+</sup> cells in ZI between control and PTSD mice (n = 8 mice for control group and n = 7 mice for PTSD group). Statistical significance was determined by Two-tailed unpaired t-test. (G) Percentage of GFP<sup>+</sup> Arc<sup>+</sup> cells in GFP<sup>+</sup> cells in control and PTSD mice (n=7-8). Statistical significance was determined by Two-tailed unpaired t-test. Data are presented as the mean  $\pm$  S.E.M. See Table S1 for detailed statistical information.

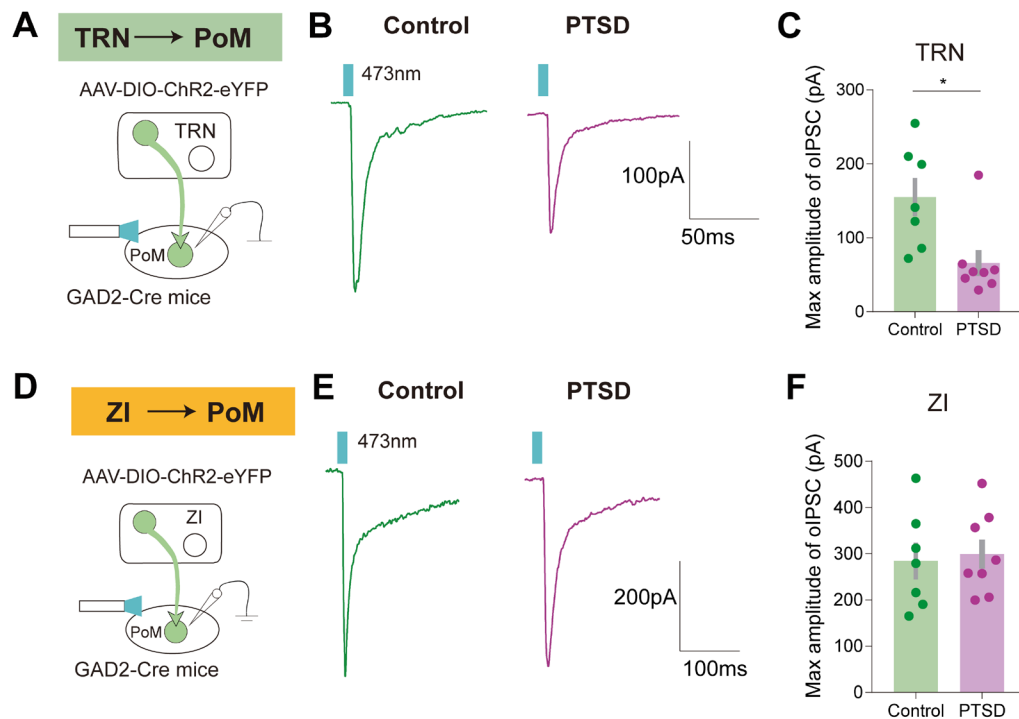

**Fig. S10. Impaired TRN inhibitory inputs to PoM in PTSD mice.** (A) Schematic of the viral strategy and slice recordings in PoM evoked by photoactivation of TRN terminals. (B) Representative oIPSC evoked by 473nm light stimulation in PoM neurons received inputs from TRN in control and PTSD mice. (C) The maximal amplitude of oIPSC in control and PTSD mice ( $n = 7$  neurons for control group and  $n = 8$  neurons for PTSD group).  $*P < 0.05$ , by Two-tailed unpaired t-test. (D) Schematic of the viral strategy and slice recordings in PoM evoked by photoactivation of ZI terminals. (E) Representative oIPSC evoked by 473nm light stimulation in PoM neurons received inputs from ZI in control and PTSD mice. (F) The maximal amplitude of oIPSC in control and PTSD mice ( $n = 7$  neurons for control group and  $n = 8$  neurons for PTSD group). Statistical significance was determined by Two-tailed unpaired t-test. Data are presented as the mean  $\pm$  S.E.M. See Table S1 for detailed statistical information.

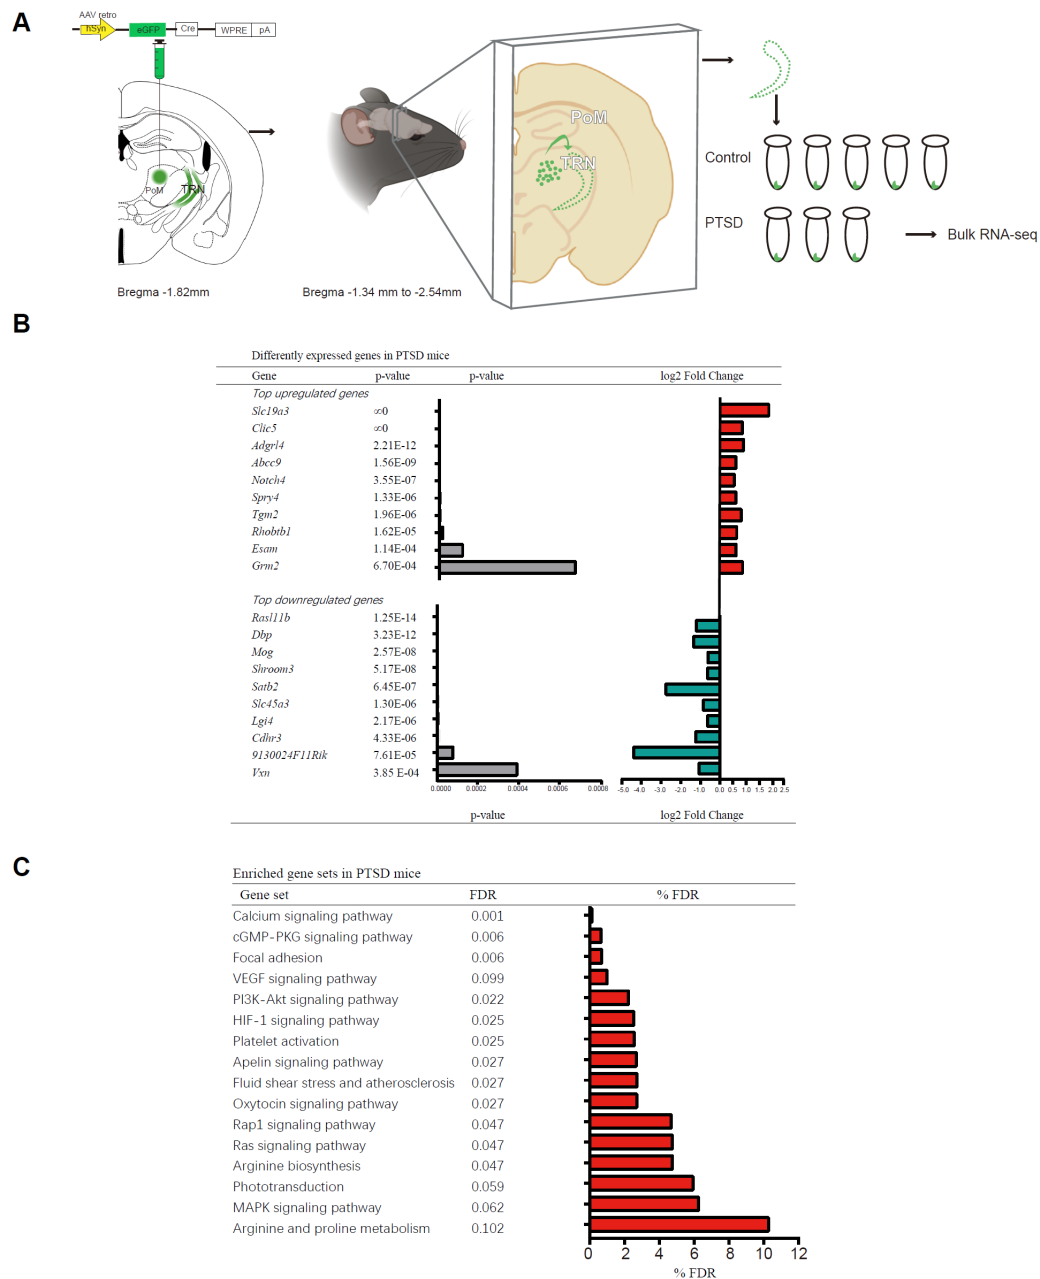

**Fig. S11. Dysregulated genes and pathways of somatosensory TRN in PTSD mice.** (A) Schematic of the viral strategy and tissue collection for bulk RNA seq from 6 control mice and 3 PTSD mice. (B) Table of the top ten upregulated (top) and downregulated (bottom) differentially expressed genes. Differential expression analysis using DEseq2 was performed on a TPM expression matrix from RNA sequencing libraries generated from TRN when comparing control and PTSD mice. (C) Enriched gene sets in PTSD mice. Gene set enrichment analysis was performed on RNA sequencing libraries generated from TRN when comparing control and PTSD mice. Table of enriched gene sets with FDR below 12%.

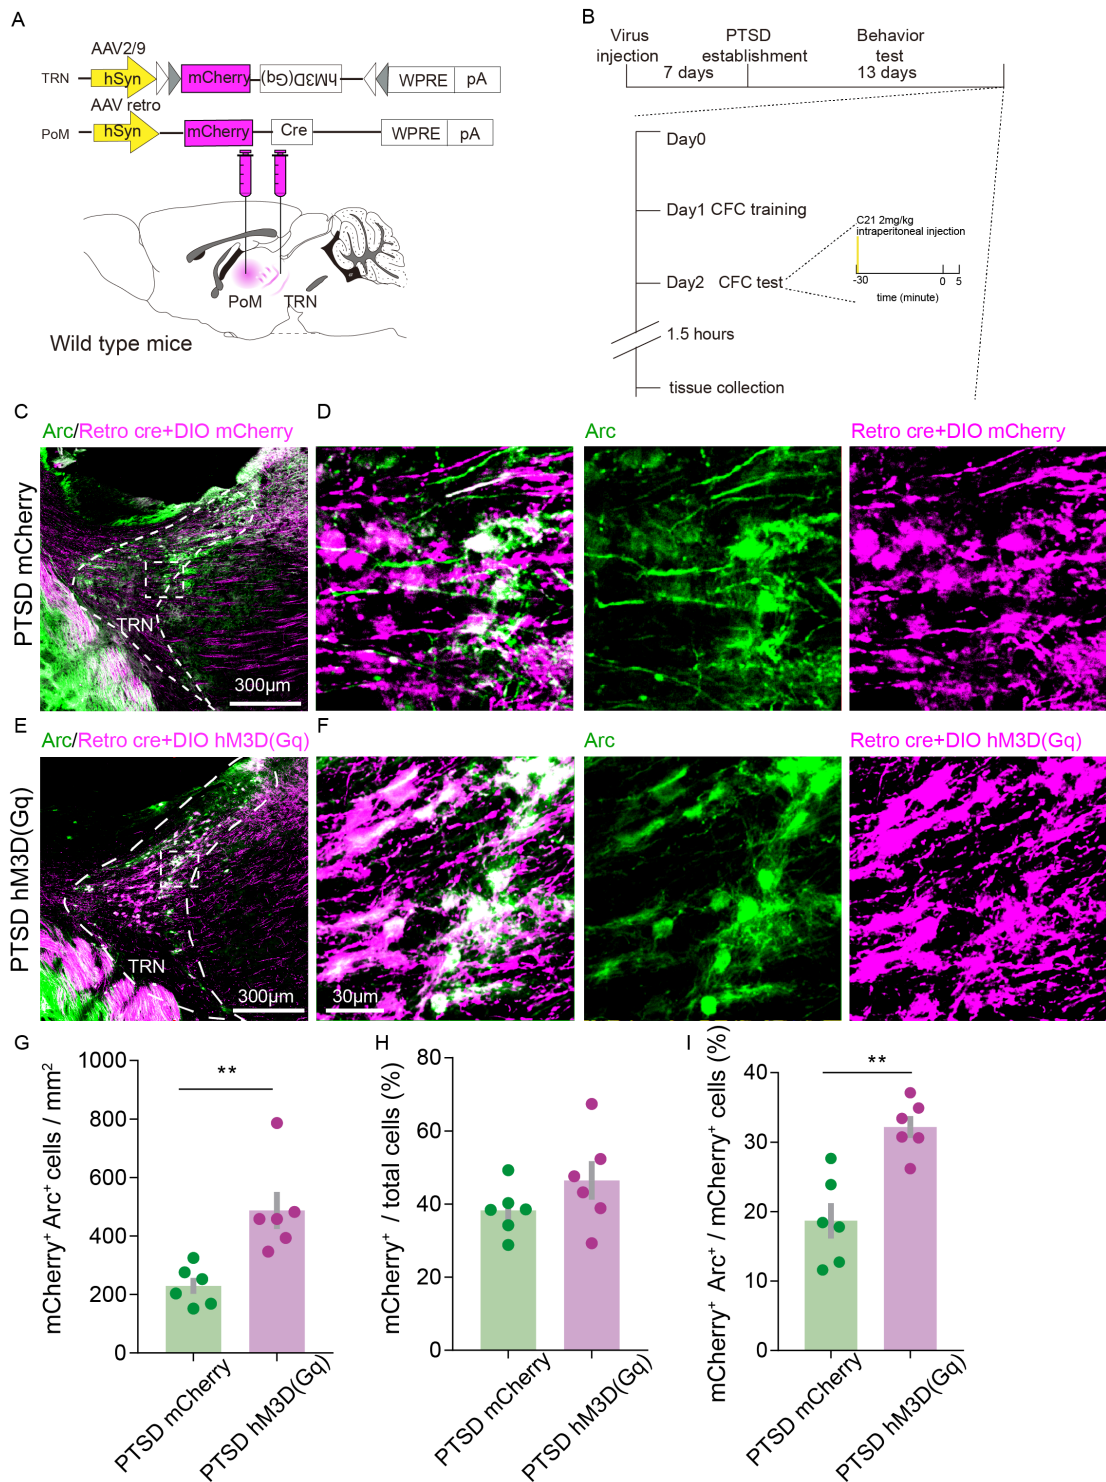

**Fig. S12. hM3D(Gq) increased Arc expression in TRN neurons in PTSD mice.** (A) Schematic of the viral strategy to chemo-genetically activate TRN neurons projecting to PoM. (B) Schematic of behavioral tests and immunohistochemical fluorescence staining. (C-D) Representative images showing mCherry expression and Arc expression in TRN. Scale bar: 300 µm (left) and 30 µm (right). (E) Representative images showing hM3D(Gq)-mCherry and Arc expression in TRN. Scale bar: 300 µm (left) and 30 µm (right). (G) The number of mCherry<sup>+</sup> Arc<sup>+</sup> cells (n = 6 mice for each group). (H) Percentage of mCherry<sup>+</sup> cells in TRN cells (n = 6 mice for each group). (I)

Percentage of mCherry<sup>+</sup> Arc<sup>+</sup> cells in mCherry<sup>+</sup> cells (n = 6 mice for each group). \*\**P* < 0.01, by Two-tailed unpaired t-test. Data are presented as the mean ± S.E.M. See Table S1 for detailed statistical information.



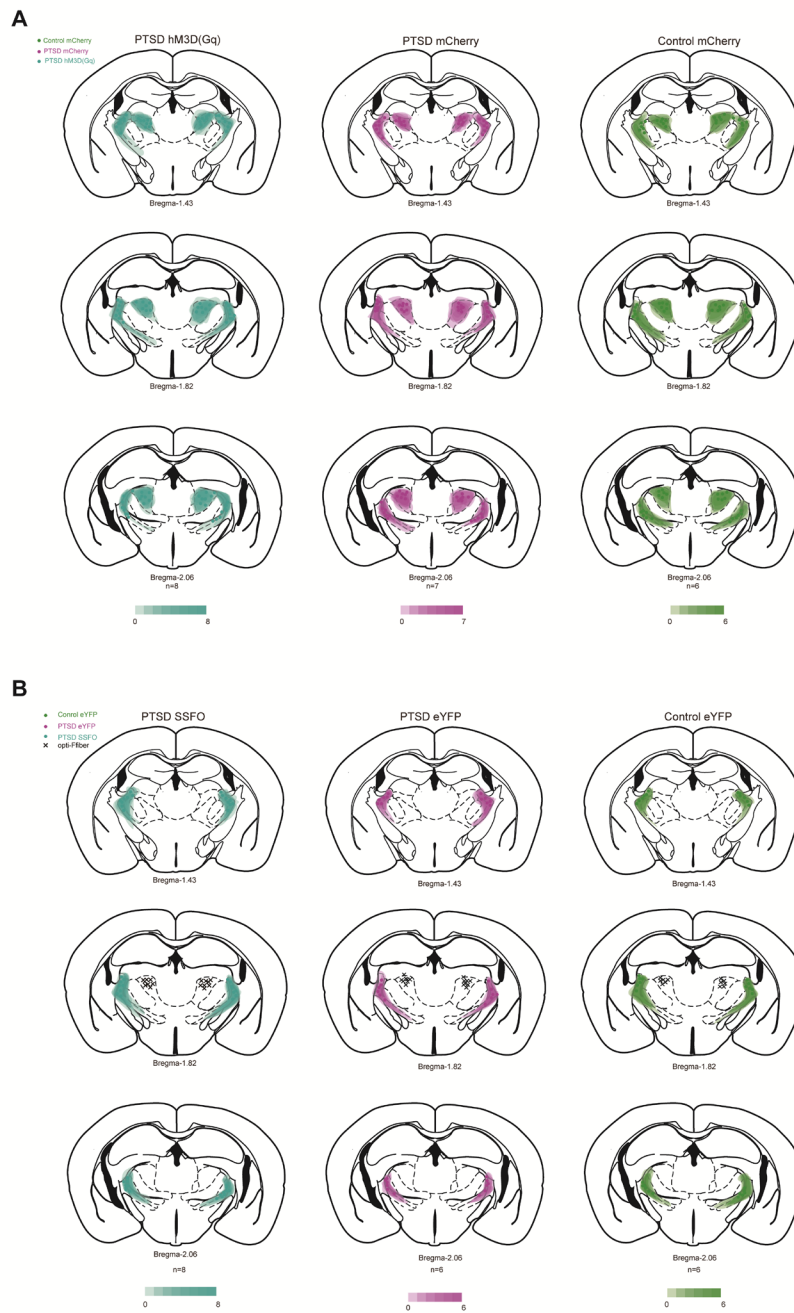

**Fig. S13. Verification of the region showing virus infection for optogenetics and DREADDs activation. (A) Schematic showing areas expressing hM3D(Gq) or mCherry in TRN or PoM. (B) Schematic showing areas expressing SSFO or eYFP in TRN.**

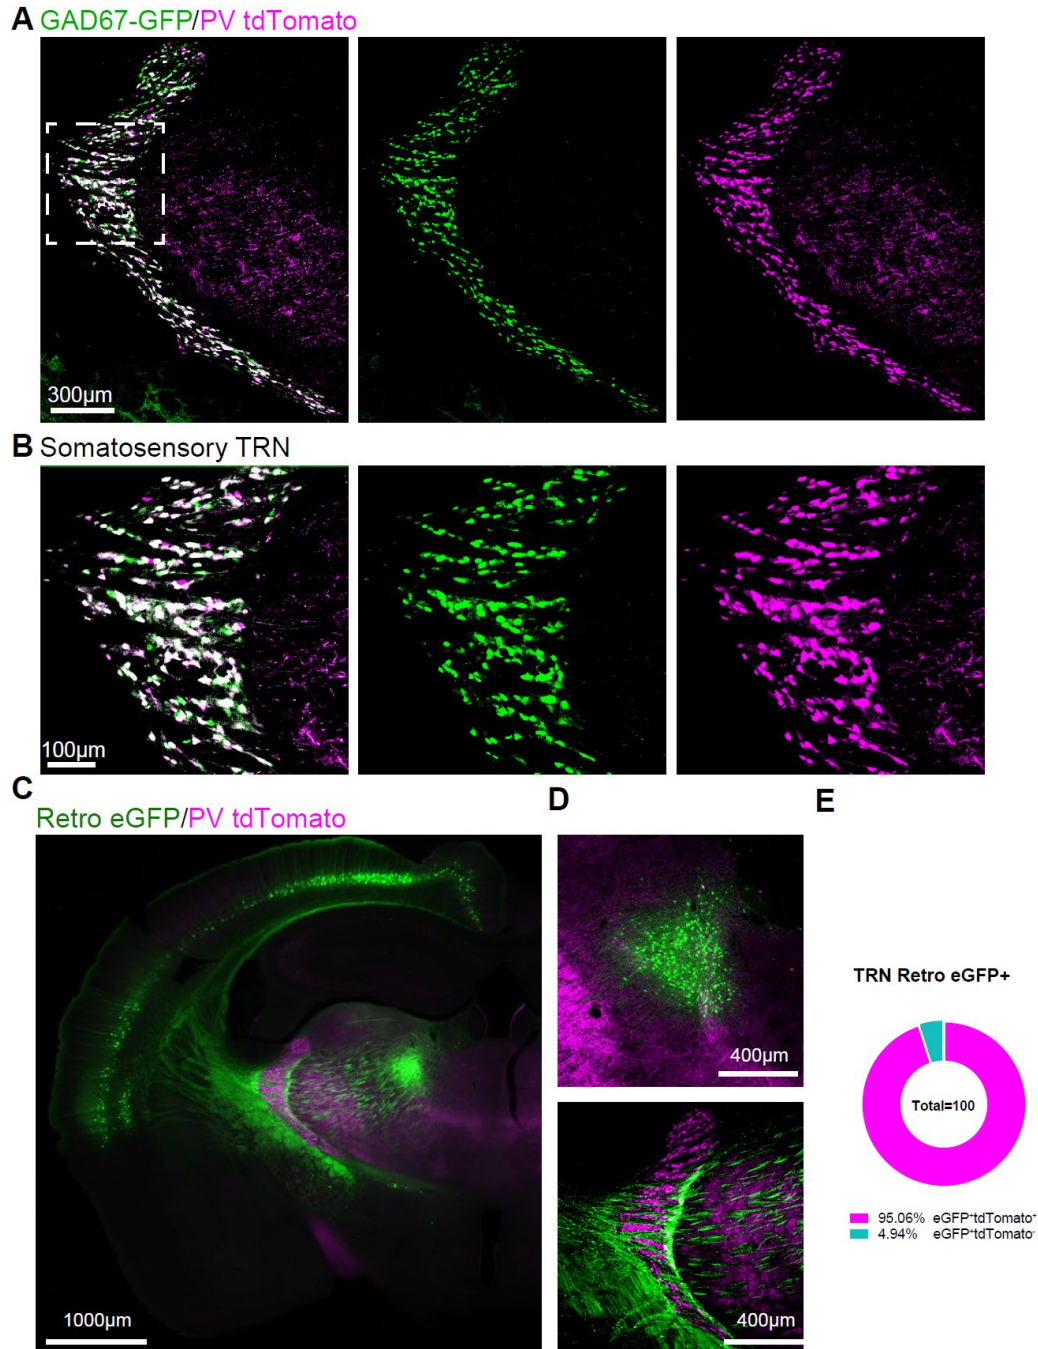

**Fig. S14. Verification of PV expression in TRN and PoM projecting cells.** (A) Representative images of TRN neurons in GAD67-GFP<sup>+</sup> and PV tdTomato<sup>+</sup> mice. Scale bar: 300 µm. (B) Representative images of neurons in somatosensory TRN in GAD67-GFP<sup>+</sup> and PV tdTomato<sup>+</sup> mice. Scale bar: 100 µm. (C) A low-magnification image showing eGFP expression in PV tdTomato<sup>+</sup> mice. Scale bar: 1000 µm. (D) Representative images of Retro-eGFP virus expression in PoM (up) and TRN (bottom). Scale bar: 400 µm. (E) Percentage of eGFP<sup>+</sup> tdTomato<sup>+</sup> cells in eGFP<sup>+</sup> cells in TRN.

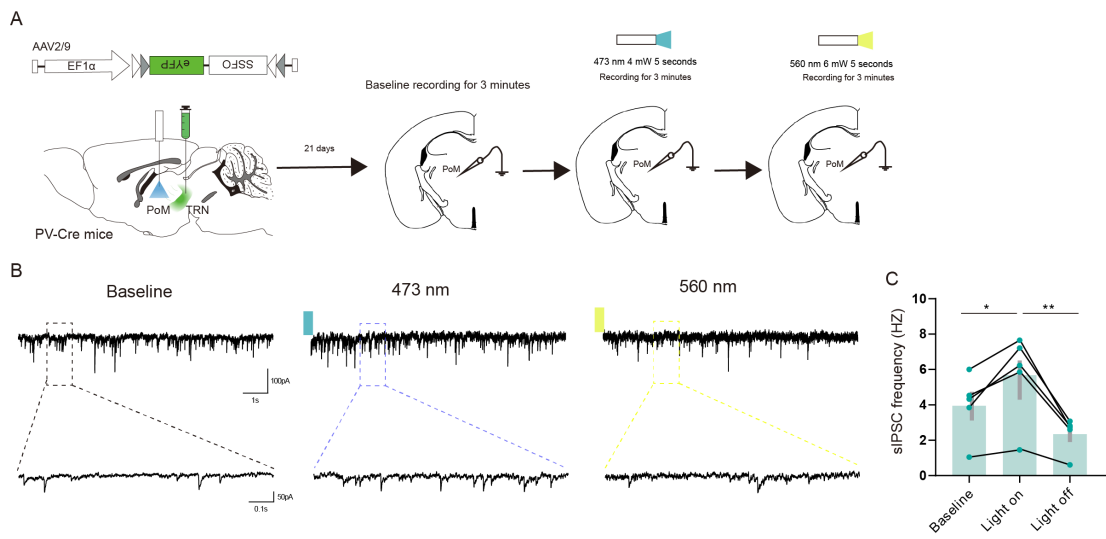

**Fig. S15. SSFO enhanced the inhibitory input to PoM.** (A) Schematic of the viral strategy and slice recordings. (B) Representative sIPSCs of PoM neurons received illuminating of 473nm and 560nm light. Left: Baseline of sIPSCs. Middle: sIPSCs with 473nm light stimulation. Right: sIPSCs with 560nm light stimulation. (C) Summary of the frequency of sIPSCs ( $n = 5$  neurons from 3 experimental mice).  $*P < 0.05$ ,  $**P < 0.01$ , by Two-tailed paired t-test. Data are presented as the mean  $\pm$  S.E.M. See Table S1 for detailed statistical information.

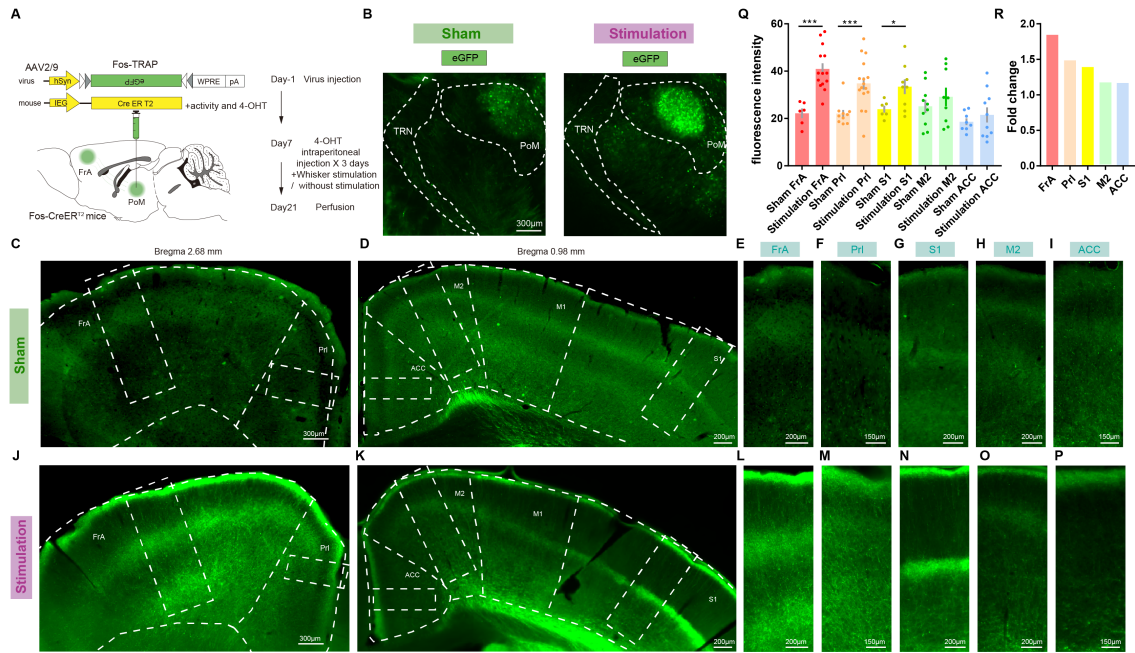

**Fig. S16. TRAPing axons of PoM cells responding to tactile threats in the cortex.** (A) Schematic of Fos-TRAP strategy for anterograde tracing of the downstream regions of PoM. (B) Representative images showing eGFP expression in PoM under low magnification in a mouse with sham stimulation and whisker stimulation. Scale bar: 300 $\mu$ m. (C) Representative images of FrA and Pr1 under low magnification in a mouse with sham stimulation. Scale bar: 300 $\mu$ m. (D) Representative images of M2, ACC and S1 under low magnification in a mouse with sham stimulation. Scale bar: 200 $\mu$ m. (E) Representative images of FrA under high magnification in a mouse with sham stimulation. Scale bar: 200 $\mu$ m. (F) Representative images of Pr1 under high magnification in a mouse with sham stimulation. Scale bar: 150 $\mu$ m. (G) Representative images of S1 under high magnification in a mouse with sham stimulation. Scale bar: 200 $\mu$ m. (H) Representative images of M2 under high magnification in a mouse with sham stimulation. Scale bar: 200 $\mu$ m. (I) Representative images of ACC under high magnification in a mouse with sham stimulation. Scale bar: 150 $\mu$ m. (J) Representative images of FrA and Pr1 under low magnification in a mouse with whisker stimulation. Scale bar: 300 $\mu$ m. (K) Representative images of M2, ACC and S1 under low magnification in a mouse with whisker stimulation. Scale bar: 200 $\mu$ m. (L) Representative images of FrA under high magnification in a mouse with whisker stimulation. Scale bar: 200 $\mu$ m. (M) Representative images of Pr1 under high magnification in a mouse with whisker stimulation. Scale bar: 150 $\mu$ m. (N) Representative images of S1 under high magnification

in a mouse with whisker stimulation. Scale bar: 200 $\mu$ m. **(O)** Representative images of M2 under high magnification in a mouse with whisker stimulation. Scale bar: 200 $\mu$ m. **(P)** Representative images of ACC under high magnification in a mouse with whisker stimulation. Scale bar: 150 $\mu$ m. **(Q)** Fluorescence intensity of different cortex in the downstream of PoM using Fos-TRAP strategy (n = 6 slices from 3 sham mice and 14 slices from 3 stimulation mice for FrA statistics; n = 10 slices from 3 sham mice and 16 slices from 3 stimulation mice for Prl statistics; n = 6 slices from 3 sham mice and 9 slices from 3 stimulation mice for S1 statistics; n = 10 slices from 3 sham mice and 9 slices from 3 stimulation mice for M2 statistics; n = 8 slices from 3 sham mice and 10 slices from 3 stimulation mice for ACC statistics.). **(R)** Fold change of fluorescence intensity of different cortex in the downstream of PoM using Fos-TRAP strategy. \* $P < 0.05$ , \*\*\* $P < 0.001$ , \*\*\*\* $P < 0.0001$ , by Two-tailed paired t-test. Data are presented as the mean  $\pm$  S.E.M. See Table S1 for detailed statistical information.

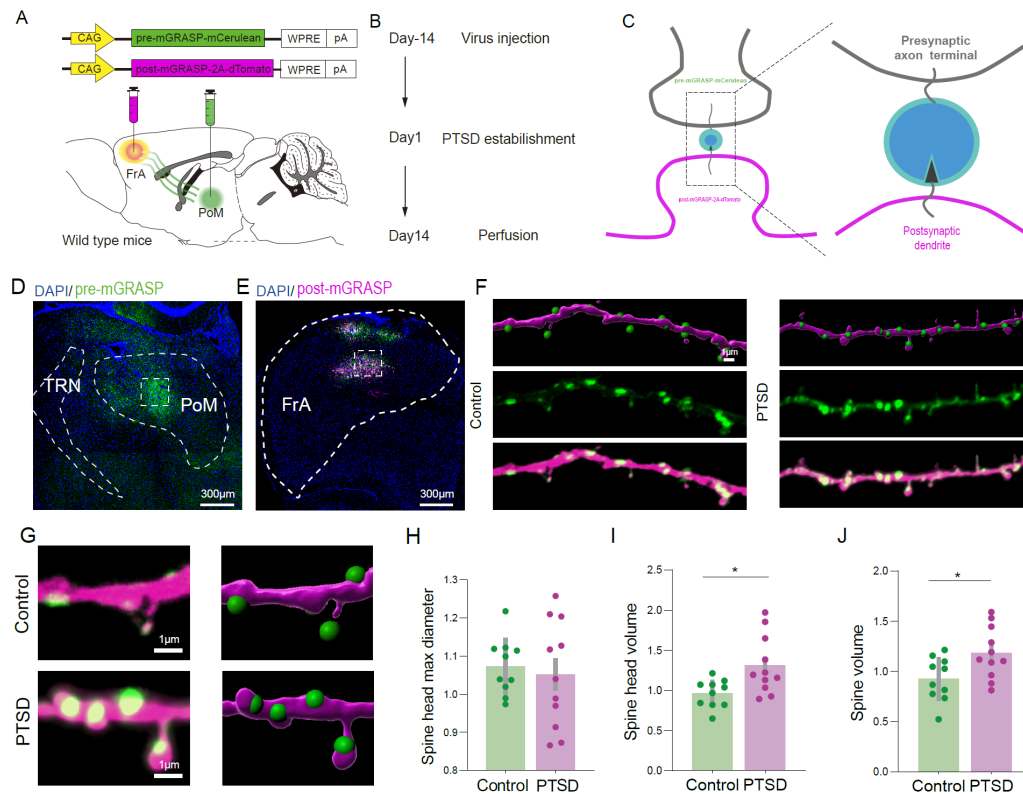

**Fig. S17. Altered spine morphology in the PoM-FrA pathway in PTSD mice.** (A) Schematic of viral strategy to selectively label synapses in FrA originating from PoM. (B) Schematic of sample preparation. (C) Schematic of dual-enhanced green fluorescent protein reconstitution across synaptic partners (dual-eGRASP). (D) Representative images showing pre-mGRASP expression in PoM. Scale bar: 300 $\mu$ m. (E) Representative images showing post-mGRASP expression in FrA. Scale bar: 300 $\mu$ m. (F) Representative images of synaptic inputs from PoM in a single FrA neuron under low magnification in control and PTSD mice. (G) Representative images of synaptic inputs from PoM in a single FrA neuron under low magnification in control and PTSD mice. (H) Max diameter of spine head in control and PTSD mice (n = 10 slices from 3 mice for control group and n = 11 slices from 3 mice for PTSD group). By Two-tailed unpaired t-test. (I) Head volume of spine in control and PTSD mice (n = 10-11 slices from 3 mice each). \* $P < 0.05$ , by Two-tailed unpaired t-test. (J) Spine volume in control and PTSD mice (n = 10-11 slices from 3 mice each). \* $P < 0.05$ , by Two-tailed unpaired t-test. Data are presented as the mean  $\pm$  S.E.M. See Table S1 for detailed statistical information.

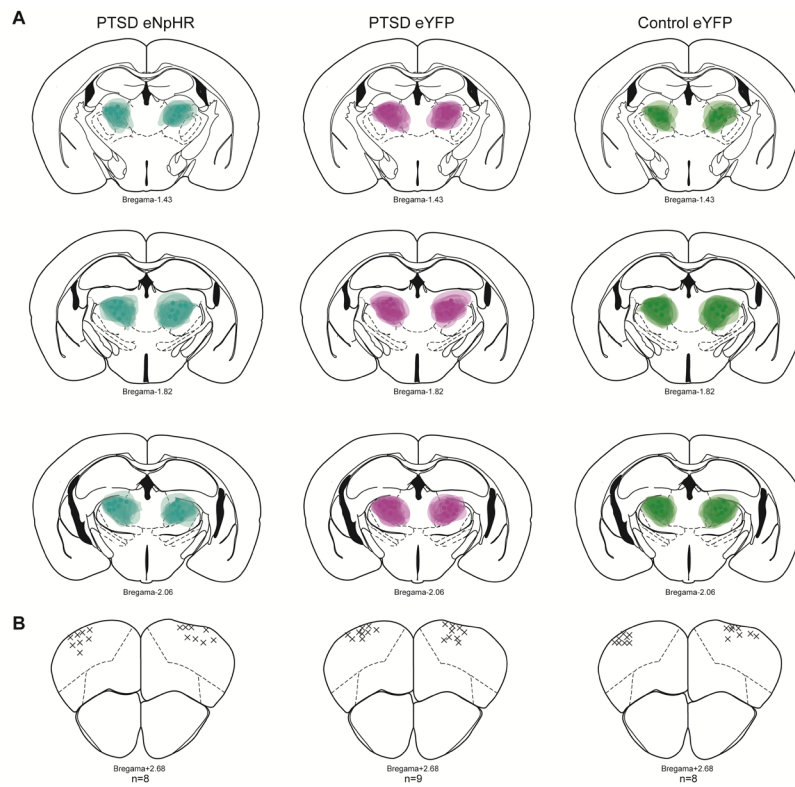

**Fig. S18. Verification of the region showing virus infection and fiber placements for optogenetic inhibition. (A) Schematic showing areas expressing eNpHR in PoM. (B) Schematic showing optical fiber site in FrA**

**Table S1. Statistical table**

| Statistical table |                                                          |                                     |             |                                                    |                                              |                            |                               |                                             |            |      |
|-------------------|----------------------------------------------------------|-------------------------------------|-------------|----------------------------------------------------|----------------------------------------------|----------------------------|-------------------------------|---------------------------------------------|------------|------|
| Data              | Response variable                                        | Groups                              | n define as | Normality Test (Shapiro-Wilk)                      | Homogeneity of variance test (Levene's test) | Hypothesis test            | Test value                    | P value                                     | summary    |      |
| Figure 1C         | Response score (Total)                                   | control n=7                         | mouse       | W=0.9151 df=7 p=0.4324                             | F=2 df1=1 df2=11<br>p=0.4196                 | Mann-Whitney U test        | U=0                           | p=0.0006                                    | ***        |      |
|                   |                                                          | PTSD n=7                            |             | W=0.6644 df=7 p=0.0015                             |                                              |                            |                               |                                             |            |      |
| Figure 1E         | Freezing time (%) in the Day 2 CFC test                  | control n=10                        | mouse       | W=0.9222 df=10 p=0.3755                            | F=5.089 df1=1 df2=19 p=0.0238                | Two-tailed unpaired t-test | t=2.399 df=18                 | p=0.0275                                    | *          |      |
|                   |                                                          | PTSD n=10                           |             | W=0.899 df=10 p=0.2138                             |                                              |                            |                               |                                             |            |      |
| Figure 1F         | Freezing time (%) in the Day 7 CFC test                  | control n=10                        | mouse       | W=0.9356 df=10 p=0.5056                            | F=17.36 df1=1 df2=19 p=0.0002                | Two-tailed unpaired t-test | t=2.118 df=18                 | p=0.0484                                    | *          |      |
|                   |                                                          | PTSD n=10                           |             | W=0.8484 df=10 p=0.0556                            |                                              |                            |                               |                                             |            |      |
| Figure 2F         | PoM Arc                                                  | control n=10<br>PTSD n=9            | mouse       | W=0.8957 df=10 p=0.1963<br>W=0.8664 df=9 p=0.1123  | F=11.33 df1=1 df2=17 p=0.0014                | Two-tailed unpaired t-test | t=3.122 df=17                 | p=0.0062                                    | **         |      |
| Figure 2G         | VPM Arc                                                  | control n=10<br>PTSD n=9            | mouse       | W=0.9648 df=10 p=0.8389<br>W=0.958 df=9 p=0.7767   | F=1.976 df1=1 df2=17 p=0.3303                | Two-tailed unpaired t-test | t=0.469 df=17                 | p=0.6450                                    | ns         |      |
| Figure 2J         | Area under curve in fiber recording                      | control n=7<br>PTSD n=5             | mouse       | W=0.9625 df=7 p=0.1594<br>W=0.8784 df=5 p=0.3022   | F=1.849 df1=1 df2=10 p=0.3303                | Two-tailed unpaired t-test | t=2.538 df=10                 | p=0.0294                                    | *          |      |
| Figure 2N         | Event frequency in the Day 2 CFC test in fiber recording | control n=5<br>PTSD n=4             | mouse       | W=0.8853 df=5 p=0.3342<br>W=0.8317 df=4 p=0.1724   | F=6.116 df1=1 df2=7 p=0.1127                 | Two-tailed unpaired t-test | t=2.89 df=7                   | p=0.0233                                    | *          |      |
| Figure 2P         | Event frequency in the Day 7 CFC test in fiber recording | control n=5<br>PTSD n=4             | mouse       | W=0.9385 df=5 p=0.6557<br>W=0.8844 df=4 p=0.3577   | F=41.39 df1=1 df2=7 p=0.0036                 | Two-tailed unpaired t-test | t=2.629 df=7                  | p=0.0339                                    | *          |      |
| Figure 3D         | Response score (Total)                                   | Control eGFP n=10                   | mouse       | W=0.9674 df=10 p=0.8654                            | F=0.3346 df1=2 df2=21 p=0.7194               | One-way ANOVA              | F=25.35 df1=1 df2=21 p<0.0001 | p Control eGFP vs. PTSD eGFP<0.0001         | ****       |      |
|                   |                                                          | PTSD eGFP n=7                       |             | W=0.9671 df=7 p=0.8766                             |                                              |                            |                               |                                             |            |      |
|                   |                                                          | PTSD Kir2.1 n=7                     |             | W=0.9654 df=7 p=0.8632                             |                                              |                            |                               |                                             |            |      |
| Figure 3E         | Freezing time (%) in the Day 2 CFC test                  | Control eGFP n=10                   | mouse       | W=0.8827 df=10 p=0.1402                            | F=0.04811 df1=2 df2=21 p=0.9531              | One-way ANOVA              | F=10.03 df1=1 df2=21 p=0.0009 | p Control eGFP vs. PTSD Kir2.1=0.4084       | ***        |      |
|                   |                                                          | PTSD eGFP n=7                       |             | W=0.941 df=7 p=0.6475                              |                                              |                            |                               |                                             |            |      |
|                   |                                                          | PTSD Kir2.1 n=7                     |             | W=0.9468 df=7 p=0.7008                             |                                              |                            |                               |                                             |            |      |
| Figure 3F         | Freezing time (%) in the Day 7 CFC test                  | Control eGFP n=10                   | mouse       | W=0.9557 df=10 p=0.7360                            | F=1.974 df1=2 df2=21 p=0.1639                | One-way ANOVA              | F=5.265 df1=1 df2=21 p=0.0140 | p Control eGFP vs. PTSD Kir2.1=0.9749       | *          |      |
|                   |                                                          | PTSD eGFP n=7                       |             | W=0.971 df=7 p=0.9056                              |                                              |                            |                               |                                             |            |      |
|                   |                                                          | PTSD Kir2.1 n=7                     |             | W=0.9613 df=7 p=0.8297                             |                                              |                            |                               |                                             |            |      |
| Figure 3J         | Response score (Total)                                   | Control mCherry n=10                | mouse       | W=0.8752 df=10 p=0.1149                            | F=0.2484 df1=2 df2=19 p=0.7825               | One-way ANOVA              | F=11.09 df1=1 df2=21 p=0.0006 | p Control mCherry vs. PTSD mCherry=0.0016   | ***        |      |
|                   |                                                          | PTSD mCherry n=6                    |             | W=0.9076 df=6 p=0.4207                             |                                              |                            |                               |                                             |            |      |
|                   |                                                          | PTSD hM4D (Gi) n=6                  |             | W=0.9713 df=6 p=0.9009                             |                                              |                            |                               |                                             |            |      |
| Figure 3K         | Freezing time (%) in the Day 2 CFC test                  | Control mCherry n=10                | mouse       | W=0.9558 df=10 p=0.7374                            | F=1.834 df1=2 df2=19 p=0.1870                | One-way ANOVA              | F=12.8 df1=1 df2=21 p=0.0003  | p Control mCherry vs. PTSD mCherry=0.0002   | ***        |      |
|                   |                                                          | PTSD mCherry n=6                    |             | W=0.9063 df=6 p=0.4128                             |                                              |                            |                               |                                             |            |      |
|                   |                                                          | PTSD hM4D (Gi) n=6                  |             | W=0.9776 df=6 p=0.9390                             |                                              |                            |                               |                                             |            |      |
| Figure 3L         | Freezing time (%) in the Day 7 CFC test                  | Control mCherry n=10                | mouse       | W=0.8667 df=10 p=0.0915                            | F=0.1991 df1=2 df2=19 p=0.8212               | One-way ANOVA              | F=11.93 df1=1 df2=21 p=0.0004 | p Control mCherry vs. PTSD hM4D (Gi)=0.0114 | ***        |      |
|                   |                                                          | PTSD mCherry n=6                    |             | W=0.9172 df=6 p=0.4854                             |                                              |                            |                               |                                             |            |      |
|                   |                                                          | PTSD hM4D (Gi) n=6                  |             | W=0.9225 df=6 p=0.5232                             |                                              |                            |                               |                                             |            |      |
| Figure 4E         | Density of TRN GFP+ Arc+                                 | control n=12<br>PTSD n=12           | mouse       | W=0.9548 df=12 p=0.7077<br>W=0.9344 df=12 p=0.4292 | F=8.621 df1=1 df2=22 p=0.0012                | Two-tailed unpaired t-test | t=5.271 df=22                 | p<0.0001                                    | ****       |      |
| Figure 4F         | Percentage of GFP+ Arc+ / GFP+ cells in TRN              | control n=12<br>PTSD n=12           | mouse       | W=0.9637 df=12 p=0.8354<br>W=0.9531 df=12 p=0.6824 | F=8.134 df1=1 df2=22 p=0.0016                | Two-tailed unpaired t-test | t=5.258 df=22                 | p<0.0001                                    | ****       |      |
| Figure 4I         | TRN-PoM PPR                                              | 50ms control n=7<br>50ms PTSD n=8   | neuron      | W=0.908 df=7 p=0.3825<br>W=0.7552 df=8 p=0.0093    | F=8.127 df1=1 df2=13 p=0.0208                | Mann-Whitney U test        | U=6                           | p=0.0093                                    | **         |      |
|                   |                                                          | 100ms control n=7<br>100ms PTSD n=8 | neuron      | W=0.9489 df=7 p=0.7195<br>W=0.8858 df=8 p=0.2138   | F=15 df1=1 df2=13 p=0.0040                   | Two-tailed unpaired t-test | t=3.21 df=13                  | p=0.0068                                    | **         |      |
|                   |                                                          | 200ms control n=7<br>200ms PTSD n=8 | neuron      | W=0.9087 df=7 p=0.3868<br>W=0.8987 df=8 p=0.2810   | F=4.801 df1=1 df2=13 p=0.0744                | Two-tailed unpaired t-test | t=5.293 df=13                 | p=0.0001                                    | ***        |      |
|                   |                                                          | control n=7<br>PTSD n=8             | neuron      | Not all subgroups meets p>=0.05                    | Not all subgroups meets p>=0.05              | Friedman's M test          | X <sup>2</sup> =21.000 df=1   |                                             | p < 0.0001 | **** |



**Statistical table**

| Data                    | Response variable                                    | Groups                                                           | n define as                      | Normality Test (Shapiro-Wilk)                     | Homogeneity of variance test (Levene's test) | Hypothesis test           | Test value                                 | P value                                                                                                                                 | summary |
|-------------------------|------------------------------------------------------|------------------------------------------------------------------|----------------------------------|---------------------------------------------------|----------------------------------------------|---------------------------|--------------------------------------------|-----------------------------------------------------------------------------------------------------------------------------------------|---------|
| Figure 4L               | ZI-PoM PPR                                           | 50ms control n=8                                                 | neuron                           | W=0.975 df=8 p=0.9340                             | F=1.726 df1=1<br>df2=13 p=0.4912             | Mann-Whitney U test       | U=14                                       | p=0.1206                                                                                                                                | ns      |
|                         |                                                      | 50ms PTSD n=7                                                    |                                  | W=0.7441 df=7 p=0.0110                            |                                              |                           |                                            |                                                                                                                                         |         |
|                         |                                                      | 100ms control n=8                                                | neuron                           | W=0.9354 df=8 p=0.5668                            | F=1.041 df1=1<br>df2=13 p=0.9446             |                           |                                            |                                                                                                                                         |         |
|                         |                                                      | 100ms PTSD n=7                                                   |                                  | W=0.8728 df=7 p=0.1963                            |                                              |                           |                                            |                                                                                                                                         |         |
|                         |                                                      | 200ms control n=8                                                | neuron                           | W=0.9431 df=8 p=0.6420                            | F=1.599 df1=1<br>df2=13 p=0.5513             |                           |                                            |                                                                                                                                         |         |
|                         |                                                      | 200ms PTSD n=7                                                   |                                  | W=0.8403 df=7 p=0.1000                            |                                              |                           |                                            |                                                                                                                                         |         |
| control n=8<br>PTSD n=7 | neuron                                               | Not all subgroups meets p > 0.05                                 | Not all subgroups meets p > 0.05 | Friedman's M test                                 | $\chi^2=2.333$ df=1                          | p =0.2385                 | ns                                         |                                                                                                                                         |         |
| Figure 5D               | Response score (Total)                               | Control mCherry n=6                                              | mouse                            | W=0.8221 df=6 p=0.0921                            | F=0.5297 df1=2<br>df2=18 p=0.5977            | One-way ANOVA             | F=39.58 df1=1<br>df2=18 p<0.0001           | p Control mCherry vs. PTSD mCherry <0.0001<br>p Control mCherry vs. PTSD hM3D (Gq) =0.9242<br>p PTSD mCherry vs. PTSD hM3D (Gq) <0.0001 | ****    |
|                         |                                                      | PTSD mCherry n=7                                                 |                                  | W=0.9666 df=7 p=0.8733                            |                                              |                           |                                            |                                                                                                                                         |         |
|                         |                                                      | PTSD hM3D (Gq) n=8                                               |                                  | W=0.8352 df=8 p=0.0672                            |                                              |                           |                                            |                                                                                                                                         |         |
| Figure 5E               | Freezing time (%) in the Day 2 CFC test              | Control mCherry n=6                                              | mouse                            | W=0.9113 df=6 p=0.4449                            | F=0.183 df1=2<br>df2=18 p=0.8343             | One-way ANOVA             | F=44.58 df1=1<br>df2=18 p<0.0001           | p Control mCherry vs. PTSD mCherry <0.0001<br>p Control mCherry vs. PTSD hM3D (Gq) =0.1324<br>p PTSD mCherry vs. PTSD hM3D (Gq) <0.0001 | ****    |
|                         |                                                      | PTSD mCherry n=7                                                 |                                  | W=0.8351 df=7 p=0.0895                            |                                              |                           |                                            |                                                                                                                                         |         |
|                         |                                                      | PTSD hM3D (Gq) n=8                                               |                                  | W=0.9689 df=8 p=0.8894                            |                                              |                           |                                            |                                                                                                                                         |         |
| Figure 5F               | Freezing time (%) in the Day 7 CFC test              | Control mCherry n=6                                              | mouse                            | W=0.9076 df=6 p=0.4210                            | F=2.512 df1=2<br>df2=18 p=0.1091             | Kruskal-Wallis H test     | Kruskal-Wallis statistic=13.73<br>p<0.0001 | p Control mCherry vs. PTSD mCherry =0.0022<br>p Control mCherry vs. PTSD hM3D (Gq) >0.9999<br>p PTSD mCherry vs. PTSD hM3D (Gq) =0.0082 | ****    |
|                         |                                                      | PTSD mCherry n=7                                                 |                                  | W=0.8048 df=7 p=0.0457                            |                                              |                           |                                            |                                                                                                                                         |         |
|                         |                                                      | PTSD hM3D (Gq) n=8                                               |                                  | W=0.8818 df=8 p=0.1959                            |                                              |                           |                                            |                                                                                                                                         |         |
| Figure 5J               | Response score (total)                               | Control eYFP n=6                                                 | mouse                            | W=0.7511 df=6 p=0.0204                            | F=0.2371 df1=2<br>df2=17 p=0.7915            | Kruskal-Wallis H test     | Kruskal-Wallis statistic=11.76<br>p=0.0005 | p Control eYFP vs. PTSD eYFP =0.0123<br>p Control eYFP vs. PTSD SSFO >0.9999<br>p PTSD eYFP vs. PTSD SSFO =0.0054                       | ***     |
|                         |                                                      | PTSD eYFP n=6                                                    |                                  | W=0.7709 df=6 p=0.0317                            |                                              |                           |                                            |                                                                                                                                         |         |
|                         |                                                      | PTSD SSFO n=8                                                    |                                  | W=0.935 df=8 p=0.5630                             |                                              |                           |                                            |                                                                                                                                         |         |
| Figure 5K               | Freezing time (%) in the Day 2 CFC test PTSD SSFO    | off n=8<br>on n=8                                                | mouse                            | W=0.7526 df=8 p=0.0087<br>W=0.7872 df=8 p=0.0208  | F=2.987 df1=1<br>df2=14 p=0.1721             | Wilcoxon signed-rank test | rs=0.6667 p=0.0415                         | p=0.0078                                                                                                                                | **      |
| Figure 5K               | Freezing time (%) in the Day 2 CFC test Control eYFP | off n=6<br>on n=6                                                | mouse                            | W=0.9564 df=6 p=0.7913<br>W=0.7895 df=6 p=0.0472  | F=9.1114 df1=1<br>df2=10 p=0.0299            | Wilcoxon signed-rank test | rs=0.2571 p=0.3292                         | p=0.4375                                                                                                                                | ns      |
| Figure 5K               | Freezing time (%) in the Day 2 CFC test PTSD eYFP    | off n=6<br>on n=6                                                | mouse                            | W=0.8184 df=6 p=0.70854<br>W=0.9537 df=6 p=0.7704 | F=1.08 df1=1<br>df2=10 p=0.9351              | Two-tailed paired t-test  | t=0.02308 df=10                            | p=0.9825                                                                                                                                | ns      |
| Figure 5L               | Freezing time (%) in the Day 7 CFC test Control eYFP | off n=6<br>on n=6                                                | mouse                            | W=0.7557 df=6 p=0.0226<br>W=0.7896 df=6 p=0.0472  | F=1.657 df1=1<br>df2=10 p=0.5931             | Wilcoxon signed-rank test | rs=0.6 p=0.1208                            | p=0.0625                                                                                                                                | ns      |
| Figure 5L               | Freezing time (%) in the Day 7 CFC test PTSD SSFO    | off n=8<br>on n=8                                                | mouse                            | W=0.9134 df=8 p=0.3786<br>W=0.8959 df=8 p=0.2651  | F=3.225 df1=1<br>df2=14 p=0.1452             | Two-tailed paired t-test  | t=2.738 df=14                              | p=0.0160                                                                                                                                | *       |
| Figure 5L               | Freezing time (%) in the Day 7 CFC test PTSD eYFP    | off n=6<br>on n=6                                                | mouse                            | W=0.6638 df=6 p=0.0025<br>W=0.908 df=6 p=0.4233   | F=1.03 df1=1<br>df2=10 p=0.9753              | Wilcoxon signed-rank test | rs=0.7143 p=0.0681                         | p=0.2188                                                                                                                                | ns      |
| Figure 6Q               | CNQX in FrA                                          | baseline n=5 neurons from 3 mice<br>CNQX n=5 neurons from 3 mice | neuron                           | W=0.8666 df=6 p=0.2529<br>W=0.8601 df=6 p=0.2286  | F=859.2 df1=1 df2=8<br>p<0.0001              | Two-tailed paired t-test  | t=5.607 df=4                               | p=0.0050                                                                                                                                | **      |
| Figure 7D               | Response score (Total)                               | Control eYFP n=8                                                 | mouse                            | W=0.8352 df=8 p=0.0672                            | F=2.092 df1=2<br>df2=22 p=0.1474             | One-way ANOVA             | F=36.44 df1=1<br>df2=22 p<0.0001           | p Control eYFP vs. PTSD eYFP <0.0001<br>p Control eYFP vs. PTSD eNPHR =0.7749<br>p PTSD eYFP vs. PTSD eNPHR <0.0001                     | ****    |
|                         |                                                      | PTSD eNPHR n=9                                                   |                                  | W=0.9258 df=9 p=0.4423                            |                                              |                           |                                            |                                                                                                                                         |         |
|                         |                                                      | PTSD eYFP n=8                                                    |                                  | W=0.8774 df=8 p=0.1780                            |                                              |                           |                                            |                                                                                                                                         |         |
| Figure 7E               | Freezing time (%) in the Day 2 CFC test control eYFP | off n=8<br>on n=8                                                | mouse                            | W=0.8476 df=8 p=0.0901<br>W=0.734 df=8 p=0.0054   | F=8.437 df1=1<br>df2=14 p=0.0116             | Wilcoxon signed-rank test | rs=0.4524 p=0.1337                         | p=0.1094                                                                                                                                | ns      |
| Figure 7E               | Freezing time (%) in the Day 2 CFC test PTSD eYFP    | off n=9<br>on n=9                                                | mouse                            | W=0.9538 df=9 p=0.7316<br>W=0.9357 df=9 p=0.5375  | F=1.621 df1=1<br>df2=16 p=0.0116             | Two-tailed paired t-test  | t=1.441 df=8                               | p=0.1876                                                                                                                                | ns      |
| Figure 7E               | Freezing time (%) in the Day 2 CFC test PTSD eNPHR   | off n=8<br>on n=8                                                | mouse                            | W=0.9525 df=8 p=0.7364<br>W=0.7295 df=8 p=0.1148  | F=3.164 df1=1<br>df2=14 p=0.1628             | Wilcoxon signed-rank test | rs=0.04762<br>p=0.4674                     | p=0.0156                                                                                                                                | *       |

**Statistical table**

| Data       | Response variable                                                                        | Groups                                | n define as | Normality Test (Shapiro-Wilk)                    | Homogeneity of variance test (Levene's test) | Hypothesis test            | Test value                              | P value                                 | summary |
|------------|------------------------------------------------------------------------------------------|---------------------------------------|-------------|--------------------------------------------------|----------------------------------------------|----------------------------|-----------------------------------------|-----------------------------------------|---------|
| Figure 7F  | Freezing time (%) in the Day 7 CFC test control eYFP                                     | off n=8                               | mouse       | W=0.9361 df=8 p=0.5730                           | F=7.097 df1=1 df2=14 p=0.0192                | Wilcoxon signed-rank test  | rs=-0.381 p=0.1799                      | p=0.3828                                | ns      |
|            |                                                                                          | on n=8                                |             | W=0.7307 df=8 p=0.0050                           |                                              |                            |                                         |                                         |         |
| Figure 7F  | Freezing time (%) in the Day 7 CFC test PTSD eYFP                                        | off n=9                               | mouse       | W=0.8211 df=9 p=0.0354                           | F=1.509 df1=1 df2=16 p=0.5740                | Wilcoxon signed-rank test  | rs=0.4 p=0.1456                         | p=0.5703                                | ns      |
|            |                                                                                          | on n=9                                |             | W=0.8039 df=9 p=0.0226                           |                                              |                            |                                         |                                         |         |
| Figure 7F  | Freezing time (%) in the Day 7 CFC PTSD eNPHR                                            | off n=8                               | mouse       | W=0.6516 df=8 p=0.0006                           | F=1.699 df1=1 df2=14 p=0.5012                | Wilcoxon signed-rank test  | rs=0.2381 p=0.2911                      | p=0.0078                                | **      |
|            |                                                                                          | on n=8                                |             | W=0.8149 df=8 p=0.0413                           |                                              |                            |                                         |                                         |         |
| Figure S1B | Freezing time (%) in Cue test baseline                                                   | control n=10                          | mouse       | W=0.8779 df=10 p=0.1236                          | F=1.316 df1=1 df2=18 p=0.6895                | Two-tailed paired t-test   | t=2.3 df=18                             | p=0.0336                                | *       |
|            |                                                                                          | PTSD n=10                             |             | W=0.9316 df=10 p=0.4637                          |                                              |                            |                                         |                                         |         |
| Figure S1B | Freezing time (%) in Cue test cue                                                        | control n=10                          | mouse       | W=0.9502 df=10 p=0.6707                          | F=2.42 df1=1 df2=18 p=0.2042                 | Two-tailed paired t-test   | t=3.774 df=18                           | p=0.0014                                | **      |
|            |                                                                                          | PTSD n=10                             |             | W=0.8847 df=10 p=0.1479                          |                                              |                            |                                         |                                         |         |
| Figure S1B | Freezing time (%) in Cue test                                                            | control n=10                          | mouse       |                                                  |                                              | Two-way ANOVA              |                                         | p<0.0001                                | ****    |
|            |                                                                                          | PTSD n=10                             |             |                                                  |                                              |                            |                                         |                                         |         |
| Figure S2B | Distance in area (centimeters)                                                           | control n=10                          | mouse       | W=0.9675 df=10 p=0.8663                          | F=1.068 df1=1 df2=18 p=0.9234                | Two-tailed unpaired t-test | t=0.2966 df=18                          | p=0.7702                                | ns      |
|            |                                                                                          | PTSD n=10                             |             | W=0.9161 df=10 p=0.3256                          |                                              |                            |                                         |                                         |         |
| Figure S3C | Event frequency in CFC test before and after training in fiber recording in control mice | pre n=5                               | mouse       | W=0.9767 df=5 p=0.9163                           | F=1.053 df1=1 df2=8 p=0.9610                 | Two-tailed paired t-test   | t=2.005 df=8                            | p=0.0325                                | *       |
|            |                                                                                          | post n=5                              |             | W=0.8853 df=5 p=0.3342                           |                                              |                            |                                         |                                         |         |
| Figure S3E | Event frequency in CFC test before and after training in fiber recording in PTSD mice    | pre n=4                               | mouse       | W=0.9288 df=4 p=0.5873                           | F=2.311 df1=1 df2=6 p=0.5093                 | Two-tailed paired t-test   | t=1.451 df=6                            | p=0.0325                                | *       |
|            |                                                                                          | post n=4                              |             | W=0.8317 df=4 p=0.1724                           |                                              |                            |                                         |                                         |         |
| Figure S4E | Max ML133 sensitive current (pA) in control eGFP and Kir2.1 expressed mice               | control eGFP n=5                      | neuron      | W=0.8901 df=5 p=0.3575                           | F=1.366 df1=1 df2=8 p=0.7700                 | Two-tailed unpaired t-test | t=4.195 df=8                            | p=0.0030                                | **      |
|            |                                                                                          | Kir2.1 n=5                            |             | W=0.9131 df=5 p=0.4866                           |                                              |                            |                                         |                                         |         |
| Figure S4G | Spike number of PoM neurons in control eGFP and Kir2.1 expressed mice                    | control n=6<br>PTSD n=7               | neuron      |                                                  |                                              | Two-way ANOVA              |                                         | p=0.0462                                | *       |
| Figure S5A | Freezing time (%) in Cue test in Kir baseline                                            | Control eGFP n=7                      | mouse       | W=0.9794 df=7 p=0.9567                           | F=0.9389 df1=2 df2=17 p=0.4104               | One-way ANOVA              | F=6.929 df1=2 df2=17 p=0.0063           | p Control eGFP vs. PTSD eGFP=0.0090     | **      |
|            |                                                                                          | PTSD eGFP n=6                         |             | W=0.9491 df=6 p=0.7329                           |                                              |                            |                                         | p Control eGFP vs. PTSD Kir2.1=0.0228   |         |
|            |                                                                                          | PTSD Kir2.1 n=7                       |             | W=0.9376 df=7 p=0.6176                           |                                              |                            |                                         | p PTSD eGFP vs. PTSD Kir2.1=0.8419      |         |
| Figure S5A | Freezing time (%) in Cue test in Kir cue                                                 | Control eGFP n=7                      | mouse       | W=0.907 df=7 p=0.3754                            | F=0.7377 df1=2 df2=17 p=0.4929               | One-way ANOVA              | F=6.304 df1=2 df2=17 p=0.0090           | p Control eGFP vs. PTSD eGFP=0.0324     | **      |
|            |                                                                                          | PTSD eGFP n=6                         |             | W=0.8482 df=6 p=0.1522                           |                                              |                            |                                         | p Control eGFP vs. PTSD Kir2.1=0.0119   |         |
|            |                                                                                          | PTSD Kir2.1 n=7                       |             | W=0.9079 df=7 p=0.3813                           |                                              |                            |                                         | p PTSD eGFP vs. PTSD Kir2.1=0.9320      |         |
| Figure S5A | Freezing time (%) in Cue test in Kir                                                     | Control eGFP n=7                      | mouse       |                                                  |                                              | Two-way ANOVA              |                                         | p Control eGFP vs. PTSD eGFP=0.0324     | **      |
|            |                                                                                          | PTSD eGFP n=6                         |             |                                                  |                                              |                            |                                         | p Control eGFP vs. PTSD Kir2.1=0.0119   |         |
|            |                                                                                          | PTSD Kir2.1 n=7                       |             |                                                  |                                              |                            |                                         | p PTSD eGFP vs. PTSD Kir2.1=0.9320      |         |
| Figure S5B | Freezing time (%) in Cue test in Gi baseline                                             | Control mCherry n=9                   | mouse       | W=0.912 df=9 p=0.3301                            | F=0.8938 df1=2 df2=16 p=0.4286               | One-way ANOVA              | F=3.091 df1=1 df2=16 p=0.0733           | p Control eGFP vs. PTSD mCherry=0.2520  | ns      |
|            |                                                                                          | PTSD mCherry n=5                      |             | W=0.8825 df=5 p=0.3206                           |                                              |                            |                                         | p Control eGFP vs. PTSD hM4D(Gi)=0.5039 |         |
|            |                                                                                          | PTSD hM4D(Gi) n=5                     |             | W=0.8959 df=5 p=0.3876                           |                                              |                            |                                         | p PTSD eGFP vs. PTSD hM4D(Gi)=0.0601    |         |
| Figure S5B | Freezing time (%) in Cue test in Gi cue                                                  | Control mCherry n=9                   | mouse       | W=0.7722 df=9 p=0.0098                           | F=2.516 df1=2 df2=16 p=0.1122                | Kruskal-Wallis H test      | Kruskal-Wallis statistic=4.042 p=0.1332 | p Control eGFP vs. PTSD mCherry=0.5221  | ns      |
|            |                                                                                          | PTSD mCherry n=5                      |             | W=0.8797 df=5 p=0.3079                           |                                              |                            |                                         | p Control eGFP vs. PTSD hM4D(Gi)=0.1848 |         |
|            |                                                                                          | PTSD hM4D(Gi) n=5                     |             | W=0.7577 df=5 p=0.0350                           |                                              |                            |                                         | p PTSD eGFP vs. PTSD hM4D(Gi)>0.9999    |         |
| Figure S5B | Freezing time (%) in Cue test in Gi                                                      | Control mCherry n=9                   | mouse       |                                                  |                                              | Two-way ANOVA              |                                         | p Control eGFP vs. PTSD mCherry=0.0189  | *       |
|            |                                                                                          | PTSD mCherry n=5                      |             |                                                  |                                              |                            |                                         | p Control eGFP vs. PTSD hM4D(Gi)=0.0175 |         |
|            |                                                                                          | PTSD hM4D(Gi) n=5                     |             |                                                  |                                              |                            |                                         | p PTSD eGFP vs. PTSD hM4D(Gi)=0.9996    |         |
| Figure S6E | Density of mCherry+ Arc+ cells in PoM                                                    | PTSD mCherry n=5<br>PTSD hM4D(Gi) n=5 | mouse       | W=0.9646 df=5 p=0.8397<br>W=0.7932 df=5 p=0.0712 | F=1.348 df1=1 df2=8 p=0.7793                 | Two-tailed unpaired t-test | t=3.182 df=8                            | p=0.0130                                | *       |

**Statistical table**

| Data        | Response variable                                              | Groups                                                          | n define as | Normality Test (Shapiro-Wilk)                      | Homogeneity of variance test (Levene's test) | Hypothesis test            | Test value                  | P value    | summary |            |                                                      |                         |       |                                  |                                  |                            |                             |            |      |                   |                                              |                         |                                           |                                                  |                               |                                  |                                  |                   |                             |            |                                          |                         |                                              |                                                  |                               |                                                  |                               |                            |               |            |                                             |                         |                                          |                                                  |                               |                                                  |                               |                            |                |             |                                                                |                         |                                             |                                                  |                               |                                                  |                               |                     |      |             |                                                               |                         |                                                                |                                                  |                               |                                                  |                               |                            |               |             |                                       |                         |                                                               |                                                  |                               |                                                  |                               |                            |               |             |                                     |                         |                                       |                                                 |                               |                                                  |                               |                     |     |             |                                                      |                         |                                     |                                                  |                               |                                                 |                               |                            |               |             |                                               |                         |                                                      |                                                  |                              |                                                  |                               |                            |               |             |                                                |                         |                                               |                                                  |                               |                                                  |                              |                            |              |             |                                                            |                                                                |                                                |                                                   |                               |                                                  |                               |                            |              |             |                                                            |                                                                 |                                                            |                                                                |                               |                                                   |                               |                            |               |             |                                                           |                                                               |                                                            |                                                                 |                               |                                                    |                               |                            |               |             |                                                           |                                                                |                                                           |                                                               |                              |                                                |                               |                            |               |             |                                                            |                                                                |                                                           |                                                                |                              |                                                   |                              |                            |                |             |                         |                                                             |                                                            |                                                                |                               |                                                  |                              |                            |                |             |                   |                                                             |                         |                                                             |                              |                                                    |                               |                            |                |             |              |                                                             |                   |                                                             |                               |                                                  |                              |                            |               |          |   |             |              |
|-------------|----------------------------------------------------------------|-----------------------------------------------------------------|-------------|----------------------------------------------------|----------------------------------------------|----------------------------|-----------------------------|------------|---------|------------|------------------------------------------------------|-------------------------|-------|----------------------------------|----------------------------------|----------------------------|-----------------------------|------------|------|-------------------|----------------------------------------------|-------------------------|-------------------------------------------|--------------------------------------------------|-------------------------------|----------------------------------|----------------------------------|-------------------|-----------------------------|------------|------------------------------------------|-------------------------|----------------------------------------------|--------------------------------------------------|-------------------------------|--------------------------------------------------|-------------------------------|----------------------------|---------------|------------|---------------------------------------------|-------------------------|------------------------------------------|--------------------------------------------------|-------------------------------|--------------------------------------------------|-------------------------------|----------------------------|----------------|-------------|----------------------------------------------------------------|-------------------------|---------------------------------------------|--------------------------------------------------|-------------------------------|--------------------------------------------------|-------------------------------|---------------------|------|-------------|---------------------------------------------------------------|-------------------------|----------------------------------------------------------------|--------------------------------------------------|-------------------------------|--------------------------------------------------|-------------------------------|----------------------------|---------------|-------------|---------------------------------------|-------------------------|---------------------------------------------------------------|--------------------------------------------------|-------------------------------|--------------------------------------------------|-------------------------------|----------------------------|---------------|-------------|-------------------------------------|-------------------------|---------------------------------------|-------------------------------------------------|-------------------------------|--------------------------------------------------|-------------------------------|---------------------|-----|-------------|------------------------------------------------------|-------------------------|-------------------------------------|--------------------------------------------------|-------------------------------|-------------------------------------------------|-------------------------------|----------------------------|---------------|-------------|-----------------------------------------------|-------------------------|------------------------------------------------------|--------------------------------------------------|------------------------------|--------------------------------------------------|-------------------------------|----------------------------|---------------|-------------|------------------------------------------------|-------------------------|-----------------------------------------------|--------------------------------------------------|-------------------------------|--------------------------------------------------|------------------------------|----------------------------|--------------|-------------|------------------------------------------------------------|----------------------------------------------------------------|------------------------------------------------|---------------------------------------------------|-------------------------------|--------------------------------------------------|-------------------------------|----------------------------|--------------|-------------|------------------------------------------------------------|-----------------------------------------------------------------|------------------------------------------------------------|----------------------------------------------------------------|-------------------------------|---------------------------------------------------|-------------------------------|----------------------------|---------------|-------------|-----------------------------------------------------------|---------------------------------------------------------------|------------------------------------------------------------|-----------------------------------------------------------------|-------------------------------|----------------------------------------------------|-------------------------------|----------------------------|---------------|-------------|-----------------------------------------------------------|----------------------------------------------------------------|-----------------------------------------------------------|---------------------------------------------------------------|------------------------------|------------------------------------------------|-------------------------------|----------------------------|---------------|-------------|------------------------------------------------------------|----------------------------------------------------------------|-----------------------------------------------------------|----------------------------------------------------------------|------------------------------|---------------------------------------------------|------------------------------|----------------------------|----------------|-------------|-------------------------|-------------------------------------------------------------|------------------------------------------------------------|----------------------------------------------------------------|-------------------------------|--------------------------------------------------|------------------------------|----------------------------|----------------|-------------|-------------------|-------------------------------------------------------------|-------------------------|-------------------------------------------------------------|------------------------------|----------------------------------------------------|-------------------------------|----------------------------|----------------|-------------|--------------|-------------------------------------------------------------|-------------------|-------------------------------------------------------------|-------------------------------|--------------------------------------------------|------------------------------|----------------------------|---------------|----------|---|-------------|--------------|
| Figure S6F  | percentage of mCherry+ cells in PoM                            | PTSD mCherry n=5                                                | mouse       | W=0.9056 df=5 p=0.4417                             | F=1.781 df1=1 df2=8 p=0.5899                 | Two-tailed unpaired t-test | t=1.319 df=8                | p=0.2236   | ns      |            |                                                      |                         |       |                                  |                                  |                            |                             |            |      |                   |                                              |                         |                                           |                                                  |                               |                                  |                                  |                   |                             |            |                                          |                         |                                              |                                                  |                               |                                                  |                               |                            |               |            |                                             |                         |                                          |                                                  |                               |                                                  |                               |                            |                |             |                                                                |                         |                                             |                                                  |                               |                                                  |                               |                     |      |             |                                                               |                         |                                                                |                                                  |                               |                                                  |                               |                            |               |             |                                       |                         |                                                               |                                                  |                               |                                                  |                               |                            |               |             |                                     |                         |                                       |                                                 |                               |                                                  |                               |                     |     |             |                                                      |                         |                                     |                                                  |                               |                                                 |                               |                            |               |             |                                               |                         |                                                      |                                                  |                              |                                                  |                               |                            |               |             |                                                |                         |                                               |                                                  |                               |                                                  |                              |                            |              |             |                                                            |                                                                |                                                |                                                   |                               |                                                  |                               |                            |              |             |                                                            |                                                                 |                                                            |                                                                |                               |                                                   |                               |                            |               |             |                                                           |                                                               |                                                            |                                                                 |                               |                                                    |                               |                            |               |             |                                                           |                                                                |                                                           |                                                               |                              |                                                |                               |                            |               |             |                                                            |                                                                |                                                           |                                                                |                              |                                                   |                              |                            |                |             |                         |                                                             |                                                            |                                                                |                               |                                                  |                              |                            |                |             |                   |                                                             |                         |                                                             |                              |                                                    |                               |                            |                |             |              |                                                             |                   |                                                             |                               |                                                  |                              |                            |               |          |   |             |              |
|             |                                                                | PTSD hM4D(Gi) n=5                                               |             | W=0.8671 df=5 p=0.2547                             |                                              |                            |                             |            |         | Figure S6G | percentage of mCherry+ Arc+ in mCherry+ cells in PoM | PTSD mCherry n=5        | mouse | W=0.8805 df=5 p=0.8708           | F=1.731 df1=1 df2=8 p=0.6082     | Two-tailed unpaired t-test | t=2.702 df=8                | p=0.0270   | *    | PTSD hM4D(Gi) n=5 | W=0.3117 df=5 p=0.2697                       | Figure S8F              | density of TRN GFP+ Arc+ along the bregma | control n=8<br>PTSD n=8                          | mouse                         | Not all subgroups meets p > 0.05 | Not all subgroups meets p > 0.05 | Friedman's M test | χ <sup>2</sup> =74.387 df=1 | p < 0.0001 | ****                                     | Figure S8G              | Percentage of GFP+ Arc+ in GFP+ cells in TRN | control n=8<br>PTSD n=8                          | mouse                         | W=0.9618 df=8 p=0.8268<br>W=0.9493 df=8 p=0.7040 | F=7.689 df1=1 df2=14 p=0.0153 | Two-tailed unpaired t-test | t=5.207 df=14 | p=0.0001   | ***                                         | Figure S9F              | density of ZI GFP+ Arc+ along the bregma | control n=8<br>PTSD n=7                          | mouse                         | W=0.9722 df=8 p=0.9145<br>W=0.9512 df=7 p=0.7402 | F=1.364 df1=1 df2=13 p=0.7213 | Two-tailed unpaired t-test | t=0.6605 df=13 | p=0.5205    | ns                                                             | Figure S9G              | Percentage of GFP+ Arc+ in GFP+ cells in ZI | control n=8<br>PTSD n=7                          | mouse                         | W=0.7143 df=8 p=0.0033<br>W=0.8056 df=7 p=0.0465 | F=1.033 df1=1 df2=13 p=0.9850 | Mann-Whitney U test | U=21 | p=0.4634    | ns                                                            | Figure S10C             | Max amplitude of oIPSC in PoM neurons received inputs from TRN | control n=7<br>PTSD n=8                          | mouse                         | W=0.9455 df=7 p=0.6887<br>W=0.6383 df=8 p=0.0004 | F=1.908 df1=1 df2=13 p=0.4176 | Two-tailed unpaired t-test | t=2.933 df=13 | p=0.0116    | *                                     | Figure S10F             | Max amplitude of oIPSC in PoM neurons received inputs from ZI | control n=7<br>PTSD n=8                          | mouse                         | W=0.9493 df=7 p=0.7236<br>W=0.9277 df=8 p=0.4954 | F=1.417 df1=1 df2=13 p=0.6546 | Two-tailed unpaired t-test | t=2.938 df=13 | p=0.7735    | ns                                  | Figure S12G             | Density of mCherry+ Arc+ cells in TRN | control n=6<br>PTSD n=6                         | mouse                         | W=0.9546 df=6 p=0.7776<br>W=0.7919 df=6 p=0.0497 | F=5.376 df1=1 df2=10 p=0.0886 | Mann-Whitney U test | U=0 | p=0.0022    | **                                                   | Figure S12H             | Percentage of mCherry+ cells in TRN | control n=6<br>PTSD n=6                          | mouse                         | W=0.9561 df=6 p=0.7894<br>W=0.982 df=6 p=0.9611 | F=3.619 df1=1 df2=10 p=0.1844 | Two-tailed unpaired t-test | t=1.376 df=10 | p=1.1990    | ns                                            | Figure S12I             | Percentage of mCherry+ Arc+ in mCherry+ cells in TRN | control n=6<br>PTSD n=6                          | mouse                        | W=0.9409 df=6 p=0.6661<br>W=0.9721 df=6 p=0.9062 | F=2.625 df1=1 df2=10 p=0.3130 | Two-tailed unpaired t-test | t=4.513 df=10 | p=0.0011    | **                                             | Figure S15C             | sIPSC frequency between baseline and light on | control n=5<br>PTSD n=5                          | neuron                        | W=0.9108 df=5 p=0.4727<br>W=0.8102 df=5 p=0.0978 | F=1.86 df1=1 df2=18 p=0.5625 | Two-tailed unpaired t-test | t=1.261 df=8 | p=0.0229    | *                                                          | Figure S15C                                                    | sIPSC frequency between light on and light off | control n=5<br>PTSD n=5                           | neuron                        | W=0.8102 df=5 p=0.0978<br>W=0.7183 df=5 p=0.0147 | F=6.145 df1=1 df2=18 p=0.1066 | Two-tailed unpaired t-test | t=2.831 df=8 | p=0.0079    | **                                                         | Figure S16Q                                                     | Fluorescence intensity in FrA between sham and stimulation | control n=6 slices from 3 mice<br>PTSD n=14 slices from 3 mice | Slice                         | W=0.9098 df=6 p=0.4349<br>W=0.9395 df=14 p=0.4119 | F=3.373 df1=1 df2=18 p=0.1874 | Two-tailed unpaired t-test | t=4.713 df=18 | p=0.0002    | ***                                                       | Figure S16Q                                                   | Fluorescence intensity in PrI between sham and stimulation | control n=10 slices from 3 mice<br>PTSD n=16 slices from 3 mice | Slice                         | W=0.7428 df=10 p=0.0029<br>W=0.9661 df=16 p=0.7113 | F=4.349 df1=1 df2=24 p=0.0313 | Two-tailed unpaired t-test | t=3.617 df=24 | p=0.0014    | **                                                        | Figure S16Q                                                    | Fluorescence intensity in S1 between sham and stimulation | control n=6 slices from 3 mice<br>PTSD n=9 slices from 3 mice | Slice                        | W=0.956 df=6 p=0.7881<br>W=0.958 df=9 p=0.7777 | F=6.911 df1=1 df2=13 p=0.0477 | Two-tailed unpaired t-test | t=2.366 df=13 | p=0.0342    | *                                                          | Figure S16Q                                                    | Fluorescence intensity in M2 between sham and stimulation | control n=10 slices from 3 mice<br>PTSD n=9 slices from 3 mice | Slice                        | W=0.9519 df=10 p=0.6915<br>W=0.8985 df=9 p=0.2435 | F=1.73 df1=1 df2=17 p=0.4309 | Two-tailed unpaired t-test | t=0.8623 df=17 | p=0.4005    | ns                      | Figure S16Q                                                 | Fluorescence intensity in ACC between sham and stimulation | control n=8 slices from 3 mice<br>PTSD n=10 slices from 3 mice | Slice                         | W=0.938 df=8 p=0.5918<br>W=0.9138 df=10 p=0.3084 | F=6.35 df1=1 df2=16 p=0.0235 | Two-tailed unpaired t-test | t=0.7565 df=16 | p=0.4603    | ns                | Figure S17H                                                 | Spine head max diameter | control n=10 slices in 3 mice<br>PTSD n=11 slices in 3 mice | Slice                        | W=0.9405 df=10 p=0.5584<br>W=0.9308 df=11 p=0.4187 | F=3.552 df1=1 df2=19 p=0.0698 | Two-tailed unpaired t-test | t=0.4347 df=19 | p=0.6687    | ns           | Figure S17I                                                 | Spine head volume | control n=10 slices in 3 mice<br>PTSD n=11 slices in 3 mice | Slice                         | W=0.9514 df=8 p=0.6850<br>W=0.8972 df=7 p=0.1709 | F=4.42 df1=1 df2=19 p=0.0354 | Two-tailed unpaired t-test | t=2.752 df=19 | p=0.0127 | * | Figure S17J | Spine volume |
| Figure S6G  | percentage of mCherry+ Arc+ in mCherry+ cells in PoM           | PTSD mCherry n=5                                                | mouse       | W=0.8805 df=5 p=0.8708                             | F=1.731 df1=1 df2=8 p=0.6082                 | Two-tailed unpaired t-test | t=2.702 df=8                | p=0.0270   | *       |            |                                                      |                         |       |                                  |                                  |                            |                             |            |      |                   |                                              |                         |                                           |                                                  |                               |                                  |                                  |                   |                             |            |                                          |                         |                                              |                                                  |                               |                                                  |                               |                            |               |            |                                             |                         |                                          |                                                  |                               |                                                  |                               |                            |                |             |                                                                |                         |                                             |                                                  |                               |                                                  |                               |                     |      |             |                                                               |                         |                                                                |                                                  |                               |                                                  |                               |                            |               |             |                                       |                         |                                                               |                                                  |                               |                                                  |                               |                            |               |             |                                     |                         |                                       |                                                 |                               |                                                  |                               |                     |     |             |                                                      |                         |                                     |                                                  |                               |                                                 |                               |                            |               |             |                                               |                         |                                                      |                                                  |                              |                                                  |                               |                            |               |             |                                                |                         |                                               |                                                  |                               |                                                  |                              |                            |              |             |                                                            |                                                                |                                                |                                                   |                               |                                                  |                               |                            |              |             |                                                            |                                                                 |                                                            |                                                                |                               |                                                   |                               |                            |               |             |                                                           |                                                               |                                                            |                                                                 |                               |                                                    |                               |                            |               |             |                                                           |                                                                |                                                           |                                                               |                              |                                                |                               |                            |               |             |                                                            |                                                                |                                                           |                                                                |                              |                                                   |                              |                            |                |             |                         |                                                             |                                                            |                                                                |                               |                                                  |                              |                            |                |             |                   |                                                             |                         |                                                             |                              |                                                    |                               |                            |                |             |              |                                                             |                   |                                                             |                               |                                                  |                              |                            |               |          |   |             |              |
|             |                                                                | PTSD hM4D(Gi) n=5                                               |             | W=0.3117 df=5 p=0.2697                             |                                              |                            |                             |            |         | Figure S8F | density of TRN GFP+ Arc+ along the bregma            | control n=8<br>PTSD n=8 | mouse | Not all subgroups meets p > 0.05 | Not all subgroups meets p > 0.05 | Friedman's M test          | χ <sup>2</sup> =74.387 df=1 | p < 0.0001 | **** | Figure S8G        | Percentage of GFP+ Arc+ in GFP+ cells in TRN | control n=8<br>PTSD n=8 | mouse                                     | W=0.9618 df=8 p=0.8268<br>W=0.9493 df=8 p=0.7040 | F=7.689 df1=1 df2=14 p=0.0153 | Two-tailed unpaired t-test       | t=5.207 df=14                    | p=0.0001          | ***                         | Figure S9F | density of ZI GFP+ Arc+ along the bregma | control n=8<br>PTSD n=7 | mouse                                        | W=0.9722 df=8 p=0.9145<br>W=0.9512 df=7 p=0.7402 | F=1.364 df1=1 df2=13 p=0.7213 | Two-tailed unpaired t-test                       | t=0.6605 df=13                | p=0.5205                   | ns            | Figure S9G | Percentage of GFP+ Arc+ in GFP+ cells in ZI | control n=8<br>PTSD n=7 | mouse                                    | W=0.7143 df=8 p=0.0033<br>W=0.8056 df=7 p=0.0465 | F=1.033 df1=1 df2=13 p=0.9850 | Mann-Whitney U test                              | U=21                          | p=0.4634                   | ns             | Figure S10C | Max amplitude of oIPSC in PoM neurons received inputs from TRN | control n=7<br>PTSD n=8 | mouse                                       | W=0.9455 df=7 p=0.6887<br>W=0.6383 df=8 p=0.0004 | F=1.908 df1=1 df2=13 p=0.4176 | Two-tailed unpaired t-test                       | t=2.933 df=13                 | p=0.0116            | *    | Figure S10F | Max amplitude of oIPSC in PoM neurons received inputs from ZI | control n=7<br>PTSD n=8 | mouse                                                          | W=0.9493 df=7 p=0.7236<br>W=0.9277 df=8 p=0.4954 | F=1.417 df1=1 df2=13 p=0.6546 | Two-tailed unpaired t-test                       | t=2.938 df=13                 | p=0.7735                   | ns            | Figure S12G | Density of mCherry+ Arc+ cells in TRN | control n=6<br>PTSD n=6 | mouse                                                         | W=0.9546 df=6 p=0.7776<br>W=0.7919 df=6 p=0.0497 | F=5.376 df1=1 df2=10 p=0.0886 | Mann-Whitney U test                              | U=0                           | p=0.0022                   | **            | Figure S12H | Percentage of mCherry+ cells in TRN | control n=6<br>PTSD n=6 | mouse                                 | W=0.9561 df=6 p=0.7894<br>W=0.982 df=6 p=0.9611 | F=3.619 df1=1 df2=10 p=0.1844 | Two-tailed unpaired t-test                       | t=1.376 df=10                 | p=1.1990            | ns  | Figure S12I | Percentage of mCherry+ Arc+ in mCherry+ cells in TRN | control n=6<br>PTSD n=6 | mouse                               | W=0.9409 df=6 p=0.6661<br>W=0.9721 df=6 p=0.9062 | F=2.625 df1=1 df2=10 p=0.3130 | Two-tailed unpaired t-test                      | t=4.513 df=10                 | p=0.0011                   | **            | Figure S15C | sIPSC frequency between baseline and light on | control n=5<br>PTSD n=5 | neuron                                               | W=0.9108 df=5 p=0.4727<br>W=0.8102 df=5 p=0.0978 | F=1.86 df1=1 df2=18 p=0.5625 | Two-tailed unpaired t-test                       | t=1.261 df=8                  | p=0.0229                   | *             | Figure S15C | sIPSC frequency between light on and light off | control n=5<br>PTSD n=5 | neuron                                        | W=0.8102 df=5 p=0.0978<br>W=0.7183 df=5 p=0.0147 | F=6.145 df1=1 df2=18 p=0.1066 | Two-tailed unpaired t-test                       | t=2.831 df=8                 | p=0.0079                   | **           | Figure S16Q | Fluorescence intensity in FrA between sham and stimulation | control n=6 slices from 3 mice<br>PTSD n=14 slices from 3 mice | Slice                                          | W=0.9098 df=6 p=0.4349<br>W=0.9395 df=14 p=0.4119 | F=3.373 df1=1 df2=18 p=0.1874 | Two-tailed unpaired t-test                       | t=4.713 df=18                 | p=0.0002                   | ***          | Figure S16Q | Fluorescence intensity in PrI between sham and stimulation | control n=10 slices from 3 mice<br>PTSD n=16 slices from 3 mice | Slice                                                      | W=0.7428 df=10 p=0.0029<br>W=0.9661 df=16 p=0.7113             | F=4.349 df1=1 df2=24 p=0.0313 | Two-tailed unpaired t-test                        | t=3.617 df=24                 | p=0.0014                   | **            | Figure S16Q | Fluorescence intensity in S1 between sham and stimulation | control n=6 slices from 3 mice<br>PTSD n=9 slices from 3 mice | Slice                                                      | W=0.956 df=6 p=0.7881<br>W=0.958 df=9 p=0.7777                  | F=6.911 df1=1 df2=13 p=0.0477 | Two-tailed unpaired t-test                         | t=2.366 df=13                 | p=0.0342                   | *             | Figure S16Q | Fluorescence intensity in M2 between sham and stimulation | control n=10 slices from 3 mice<br>PTSD n=9 slices from 3 mice | Slice                                                     | W=0.9519 df=10 p=0.6915<br>W=0.8985 df=9 p=0.2435             | F=1.73 df1=1 df2=17 p=0.4309 | Two-tailed unpaired t-test                     | t=0.8623 df=17                | p=0.4005                   | ns            | Figure S16Q | Fluorescence intensity in ACC between sham and stimulation | control n=8 slices from 3 mice<br>PTSD n=10 slices from 3 mice | Slice                                                     | W=0.938 df=8 p=0.5918<br>W=0.9138 df=10 p=0.3084               | F=6.35 df1=1 df2=16 p=0.0235 | Two-tailed unpaired t-test                        | t=0.7565 df=16               | p=0.4603                   | ns             | Figure S17H | Spine head max diameter | control n=10 slices in 3 mice<br>PTSD n=11 slices in 3 mice | Slice                                                      | W=0.9405 df=10 p=0.5584<br>W=0.9308 df=11 p=0.4187             | F=3.552 df1=1 df2=19 p=0.0698 | Two-tailed unpaired t-test                       | t=0.4347 df=19               | p=0.6687                   | ns             | Figure S17I | Spine head volume | control n=10 slices in 3 mice<br>PTSD n=11 slices in 3 mice | Slice                   | W=0.9514 df=8 p=0.6850<br>W=0.8972 df=7 p=0.1709            | F=4.42 df1=1 df2=19 p=0.0354 | Two-tailed unpaired t-test                         | t=2.752 df=19                 | p=0.0127                   | *              | Figure S17J | Spine volume | control n=10 slices in 3 mice<br>PTSD n=11 slices in 3 mice | Slice             | W=0.9546 df=10 p=0.7227<br>W=0.9524 df=11 p=0.6748          | F=1.399 df1=1 df2=19 p=0.6248 | Two-tailed unpaired t-test                       | t=2.458 df=19                | p=0.0237                   | *             |          |   |             |              |
| Figure S8F  | density of TRN GFP+ Arc+ along the bregma                      | control n=8<br>PTSD n=8                                         | mouse       | Not all subgroups meets p > 0.05                   | Not all subgroups meets p > 0.05             | Friedman's M test          | χ <sup>2</sup> =74.387 df=1 | p < 0.0001 | ****    |            |                                                      |                         |       |                                  |                                  |                            |                             |            |      |                   |                                              |                         |                                           |                                                  |                               |                                  |                                  |                   |                             |            |                                          |                         |                                              |                                                  |                               |                                                  |                               |                            |               |            |                                             |                         |                                          |                                                  |                               |                                                  |                               |                            |                |             |                                                                |                         |                                             |                                                  |                               |                                                  |                               |                     |      |             |                                                               |                         |                                                                |                                                  |                               |                                                  |                               |                            |               |             |                                       |                         |                                                               |                                                  |                               |                                                  |                               |                            |               |             |                                     |                         |                                       |                                                 |                               |                                                  |                               |                     |     |             |                                                      |                         |                                     |                                                  |                               |                                                 |                               |                            |               |             |                                               |                         |                                                      |                                                  |                              |                                                  |                               |                            |               |             |                                                |                         |                                               |                                                  |                               |                                                  |                              |                            |              |             |                                                            |                                                                |                                                |                                                   |                               |                                                  |                               |                            |              |             |                                                            |                                                                 |                                                            |                                                                |                               |                                                   |                               |                            |               |             |                                                           |                                                               |                                                            |                                                                 |                               |                                                    |                               |                            |               |             |                                                           |                                                                |                                                           |                                                               |                              |                                                |                               |                            |               |             |                                                            |                                                                |                                                           |                                                                |                              |                                                   |                              |                            |                |             |                         |                                                             |                                                            |                                                                |                               |                                                  |                              |                            |                |             |                   |                                                             |                         |                                                             |                              |                                                    |                               |                            |                |             |              |                                                             |                   |                                                             |                               |                                                  |                              |                            |               |          |   |             |              |
| Figure S8G  | Percentage of GFP+ Arc+ in GFP+ cells in TRN                   | control n=8<br>PTSD n=8                                         | mouse       | W=0.9618 df=8 p=0.8268<br>W=0.9493 df=8 p=0.7040   | F=7.689 df1=1 df2=14 p=0.0153                | Two-tailed unpaired t-test | t=5.207 df=14               | p=0.0001   | ***     |            |                                                      |                         |       |                                  |                                  |                            |                             |            |      |                   |                                              |                         |                                           |                                                  |                               |                                  |                                  |                   |                             |            |                                          |                         |                                              |                                                  |                               |                                                  |                               |                            |               |            |                                             |                         |                                          |                                                  |                               |                                                  |                               |                            |                |             |                                                                |                         |                                             |                                                  |                               |                                                  |                               |                     |      |             |                                                               |                         |                                                                |                                                  |                               |                                                  |                               |                            |               |             |                                       |                         |                                                               |                                                  |                               |                                                  |                               |                            |               |             |                                     |                         |                                       |                                                 |                               |                                                  |                               |                     |     |             |                                                      |                         |                                     |                                                  |                               |                                                 |                               |                            |               |             |                                               |                         |                                                      |                                                  |                              |                                                  |                               |                            |               |             |                                                |                         |                                               |                                                  |                               |                                                  |                              |                            |              |             |                                                            |                                                                |                                                |                                                   |                               |                                                  |                               |                            |              |             |                                                            |                                                                 |                                                            |                                                                |                               |                                                   |                               |                            |               |             |                                                           |                                                               |                                                            |                                                                 |                               |                                                    |                               |                            |               |             |                                                           |                                                                |                                                           |                                                               |                              |                                                |                               |                            |               |             |                                                            |                                                                |                                                           |                                                                |                              |                                                   |                              |                            |                |             |                         |                                                             |                                                            |                                                                |                               |                                                  |                              |                            |                |             |                   |                                                             |                         |                                                             |                              |                                                    |                               |                            |                |             |              |                                                             |                   |                                                             |                               |                                                  |                              |                            |               |          |   |             |              |
| Figure S9F  | density of ZI GFP+ Arc+ along the bregma                       | control n=8<br>PTSD n=7                                         | mouse       | W=0.9722 df=8 p=0.9145<br>W=0.9512 df=7 p=0.7402   | F=1.364 df1=1 df2=13 p=0.7213                | Two-tailed unpaired t-test | t=0.6605 df=13              | p=0.5205   | ns      |            |                                                      |                         |       |                                  |                                  |                            |                             |            |      |                   |                                              |                         |                                           |                                                  |                               |                                  |                                  |                   |                             |            |                                          |                         |                                              |                                                  |                               |                                                  |                               |                            |               |            |                                             |                         |                                          |                                                  |                               |                                                  |                               |                            |                |             |                                                                |                         |                                             |                                                  |                               |                                                  |                               |                     |      |             |                                                               |                         |                                                                |                                                  |                               |                                                  |                               |                            |               |             |                                       |                         |                                                               |                                                  |                               |                                                  |                               |                            |               |             |                                     |                         |                                       |                                                 |                               |                                                  |                               |                     |     |             |                                                      |                         |                                     |                                                  |                               |                                                 |                               |                            |               |             |                                               |                         |                                                      |                                                  |                              |                                                  |                               |                            |               |             |                                                |                         |                                               |                                                  |                               |                                                  |                              |                            |              |             |                                                            |                                                                |                                                |                                                   |                               |                                                  |                               |                            |              |             |                                                            |                                                                 |                                                            |                                                                |                               |                                                   |                               |                            |               |             |                                                           |                                                               |                                                            |                                                                 |                               |                                                    |                               |                            |               |             |                                                           |                                                                |                                                           |                                                               |                              |                                                |                               |                            |               |             |                                                            |                                                                |                                                           |                                                                |                              |                                                   |                              |                            |                |             |                         |                                                             |                                                            |                                                                |                               |                                                  |                              |                            |                |             |                   |                                                             |                         |                                                             |                              |                                                    |                               |                            |                |             |              |                                                             |                   |                                                             |                               |                                                  |                              |                            |               |          |   |             |              |
| Figure S9G  | Percentage of GFP+ Arc+ in GFP+ cells in ZI                    | control n=8<br>PTSD n=7                                         | mouse       | W=0.7143 df=8 p=0.0033<br>W=0.8056 df=7 p=0.0465   | F=1.033 df1=1 df2=13 p=0.9850                | Mann-Whitney U test        | U=21                        | p=0.4634   | ns      |            |                                                      |                         |       |                                  |                                  |                            |                             |            |      |                   |                                              |                         |                                           |                                                  |                               |                                  |                                  |                   |                             |            |                                          |                         |                                              |                                                  |                               |                                                  |                               |                            |               |            |                                             |                         |                                          |                                                  |                               |                                                  |                               |                            |                |             |                                                                |                         |                                             |                                                  |                               |                                                  |                               |                     |      |             |                                                               |                         |                                                                |                                                  |                               |                                                  |                               |                            |               |             |                                       |                         |                                                               |                                                  |                               |                                                  |                               |                            |               |             |                                     |                         |                                       |                                                 |                               |                                                  |                               |                     |     |             |                                                      |                         |                                     |                                                  |                               |                                                 |                               |                            |               |             |                                               |                         |                                                      |                                                  |                              |                                                  |                               |                            |               |             |                                                |                         |                                               |                                                  |                               |                                                  |                              |                            |              |             |                                                            |                                                                |                                                |                                                   |                               |                                                  |                               |                            |              |             |                                                            |                                                                 |                                                            |                                                                |                               |                                                   |                               |                            |               |             |                                                           |                                                               |                                                            |                                                                 |                               |                                                    |                               |                            |               |             |                                                           |                                                                |                                                           |                                                               |                              |                                                |                               |                            |               |             |                                                            |                                                                |                                                           |                                                                |                              |                                                   |                              |                            |                |             |                         |                                                             |                                                            |                                                                |                               |                                                  |                              |                            |                |             |                   |                                                             |                         |                                                             |                              |                                                    |                               |                            |                |             |              |                                                             |                   |                                                             |                               |                                                  |                              |                            |               |          |   |             |              |
| Figure S10C | Max amplitude of oIPSC in PoM neurons received inputs from TRN | control n=7<br>PTSD n=8                                         | mouse       | W=0.9455 df=7 p=0.6887<br>W=0.6383 df=8 p=0.0004   | F=1.908 df1=1 df2=13 p=0.4176                | Two-tailed unpaired t-test | t=2.933 df=13               | p=0.0116   | *       |            |                                                      |                         |       |                                  |                                  |                            |                             |            |      |                   |                                              |                         |                                           |                                                  |                               |                                  |                                  |                   |                             |            |                                          |                         |                                              |                                                  |                               |                                                  |                               |                            |               |            |                                             |                         |                                          |                                                  |                               |                                                  |                               |                            |                |             |                                                                |                         |                                             |                                                  |                               |                                                  |                               |                     |      |             |                                                               |                         |                                                                |                                                  |                               |                                                  |                               |                            |               |             |                                       |                         |                                                               |                                                  |                               |                                                  |                               |                            |               |             |                                     |                         |                                       |                                                 |                               |                                                  |                               |                     |     |             |                                                      |                         |                                     |                                                  |                               |                                                 |                               |                            |               |             |                                               |                         |                                                      |                                                  |                              |                                                  |                               |                            |               |             |                                                |                         |                                               |                                                  |                               |                                                  |                              |                            |              |             |                                                            |                                                                |                                                |                                                   |                               |                                                  |                               |                            |              |             |                                                            |                                                                 |                                                            |                                                                |                               |                                                   |                               |                            |               |             |                                                           |                                                               |                                                            |                                                                 |                               |                                                    |                               |                            |               |             |                                                           |                                                                |                                                           |                                                               |                              |                                                |                               |                            |               |             |                                                            |                                                                |                                                           |                                                                |                              |                                                   |                              |                            |                |             |                         |                                                             |                                                            |                                                                |                               |                                                  |                              |                            |                |             |                   |                                                             |                         |                                                             |                              |                                                    |                               |                            |                |             |              |                                                             |                   |                                                             |                               |                                                  |                              |                            |               |          |   |             |              |
| Figure S10F | Max amplitude of oIPSC in PoM neurons received inputs from ZI  | control n=7<br>PTSD n=8                                         | mouse       | W=0.9493 df=7 p=0.7236<br>W=0.9277 df=8 p=0.4954   | F=1.417 df1=1 df2=13 p=0.6546                | Two-tailed unpaired t-test | t=2.938 df=13               | p=0.7735   | ns      |            |                                                      |                         |       |                                  |                                  |                            |                             |            |      |                   |                                              |                         |                                           |                                                  |                               |                                  |                                  |                   |                             |            |                                          |                         |                                              |                                                  |                               |                                                  |                               |                            |               |            |                                             |                         |                                          |                                                  |                               |                                                  |                               |                            |                |             |                                                                |                         |                                             |                                                  |                               |                                                  |                               |                     |      |             |                                                               |                         |                                                                |                                                  |                               |                                                  |                               |                            |               |             |                                       |                         |                                                               |                                                  |                               |                                                  |                               |                            |               |             |                                     |                         |                                       |                                                 |                               |                                                  |                               |                     |     |             |                                                      |                         |                                     |                                                  |                               |                                                 |                               |                            |               |             |                                               |                         |                                                      |                                                  |                              |                                                  |                               |                            |               |             |                                                |                         |                                               |                                                  |                               |                                                  |                              |                            |              |             |                                                            |                                                                |                                                |                                                   |                               |                                                  |                               |                            |              |             |                                                            |                                                                 |                                                            |                                                                |                               |                                                   |                               |                            |               |             |                                                           |                                                               |                                                            |                                                                 |                               |                                                    |                               |                            |               |             |                                                           |                                                                |                                                           |                                                               |                              |                                                |                               |                            |               |             |                                                            |                                                                |                                                           |                                                                |                              |                                                   |                              |                            |                |             |                         |                                                             |                                                            |                                                                |                               |                                                  |                              |                            |                |             |                   |                                                             |                         |                                                             |                              |                                                    |                               |                            |                |             |              |                                                             |                   |                                                             |                               |                                                  |                              |                            |               |          |   |             |              |
| Figure S12G | Density of mCherry+ Arc+ cells in TRN                          | control n=6<br>PTSD n=6                                         | mouse       | W=0.9546 df=6 p=0.7776<br>W=0.7919 df=6 p=0.0497   | F=5.376 df1=1 df2=10 p=0.0886                | Mann-Whitney U test        | U=0                         | p=0.0022   | **      |            |                                                      |                         |       |                                  |                                  |                            |                             |            |      |                   |                                              |                         |                                           |                                                  |                               |                                  |                                  |                   |                             |            |                                          |                         |                                              |                                                  |                               |                                                  |                               |                            |               |            |                                             |                         |                                          |                                                  |                               |                                                  |                               |                            |                |             |                                                                |                         |                                             |                                                  |                               |                                                  |                               |                     |      |             |                                                               |                         |                                                                |                                                  |                               |                                                  |                               |                            |               |             |                                       |                         |                                                               |                                                  |                               |                                                  |                               |                            |               |             |                                     |                         |                                       |                                                 |                               |                                                  |                               |                     |     |             |                                                      |                         |                                     |                                                  |                               |                                                 |                               |                            |               |             |                                               |                         |                                                      |                                                  |                              |                                                  |                               |                            |               |             |                                                |                         |                                               |                                                  |                               |                                                  |                              |                            |              |             |                                                            |                                                                |                                                |                                                   |                               |                                                  |                               |                            |              |             |                                                            |                                                                 |                                                            |                                                                |                               |                                                   |                               |                            |               |             |                                                           |                                                               |                                                            |                                                                 |                               |                                                    |                               |                            |               |             |                                                           |                                                                |                                                           |                                                               |                              |                                                |                               |                            |               |             |                                                            |                                                                |                                                           |                                                                |                              |                                                   |                              |                            |                |             |                         |                                                             |                                                            |                                                                |                               |                                                  |                              |                            |                |             |                   |                                                             |                         |                                                             |                              |                                                    |                               |                            |                |             |              |                                                             |                   |                                                             |                               |                                                  |                              |                            |               |          |   |             |              |
| Figure S12H | Percentage of mCherry+ cells in TRN                            | control n=6<br>PTSD n=6                                         | mouse       | W=0.9561 df=6 p=0.7894<br>W=0.982 df=6 p=0.9611    | F=3.619 df1=1 df2=10 p=0.1844                | Two-tailed unpaired t-test | t=1.376 df=10               | p=1.1990   | ns      |            |                                                      |                         |       |                                  |                                  |                            |                             |            |      |                   |                                              |                         |                                           |                                                  |                               |                                  |                                  |                   |                             |            |                                          |                         |                                              |                                                  |                               |                                                  |                               |                            |               |            |                                             |                         |                                          |                                                  |                               |                                                  |                               |                            |                |             |                                                                |                         |                                             |                                                  |                               |                                                  |                               |                     |      |             |                                                               |                         |                                                                |                                                  |                               |                                                  |                               |                            |               |             |                                       |                         |                                                               |                                                  |                               |                                                  |                               |                            |               |             |                                     |                         |                                       |                                                 |                               |                                                  |                               |                     |     |             |                                                      |                         |                                     |                                                  |                               |                                                 |                               |                            |               |             |                                               |                         |                                                      |                                                  |                              |                                                  |                               |                            |               |             |                                                |                         |                                               |                                                  |                               |                                                  |                              |                            |              |             |                                                            |                                                                |                                                |                                                   |                               |                                                  |                               |                            |              |             |                                                            |                                                                 |                                                            |                                                                |                               |                                                   |                               |                            |               |             |                                                           |                                                               |                                                            |                                                                 |                               |                                                    |                               |                            |               |             |                                                           |                                                                |                                                           |                                                               |                              |                                                |                               |                            |               |             |                                                            |                                                                |                                                           |                                                                |                              |                                                   |                              |                            |                |             |                         |                                                             |                                                            |                                                                |                               |                                                  |                              |                            |                |             |                   |                                                             |                         |                                                             |                              |                                                    |                               |                            |                |             |              |                                                             |                   |                                                             |                               |                                                  |                              |                            |               |          |   |             |              |
| Figure S12I | Percentage of mCherry+ Arc+ in mCherry+ cells in TRN           | control n=6<br>PTSD n=6                                         | mouse       | W=0.9409 df=6 p=0.6661<br>W=0.9721 df=6 p=0.9062   | F=2.625 df1=1 df2=10 p=0.3130                | Two-tailed unpaired t-test | t=4.513 df=10               | p=0.0011   | **      |            |                                                      |                         |       |                                  |                                  |                            |                             |            |      |                   |                                              |                         |                                           |                                                  |                               |                                  |                                  |                   |                             |            |                                          |                         |                                              |                                                  |                               |                                                  |                               |                            |               |            |                                             |                         |                                          |                                                  |                               |                                                  |                               |                            |                |             |                                                                |                         |                                             |                                                  |                               |                                                  |                               |                     |      |             |                                                               |                         |                                                                |                                                  |                               |                                                  |                               |                            |               |             |                                       |                         |                                                               |                                                  |                               |                                                  |                               |                            |               |             |                                     |                         |                                       |                                                 |                               |                                                  |                               |                     |     |             |                                                      |                         |                                     |                                                  |                               |                                                 |                               |                            |               |             |                                               |                         |                                                      |                                                  |                              |                                                  |                               |                            |               |             |                                                |                         |                                               |                                                  |                               |                                                  |                              |                            |              |             |                                                            |                                                                |                                                |                                                   |                               |                                                  |                               |                            |              |             |                                                            |                                                                 |                                                            |                                                                |                               |                                                   |                               |                            |               |             |                                                           |                                                               |                                                            |                                                                 |                               |                                                    |                               |                            |               |             |                                                           |                                                                |                                                           |                                                               |                              |                                                |                               |                            |               |             |                                                            |                                                                |                                                           |                                                                |                              |                                                   |                              |                            |                |             |                         |                                                             |                                                            |                                                                |                               |                                                  |                              |                            |                |             |                   |                                                             |                         |                                                             |                              |                                                    |                               |                            |                |             |              |                                                             |                   |                                                             |                               |                                                  |                              |                            |               |          |   |             |              |
| Figure S15C | sIPSC frequency between baseline and light on                  | control n=5<br>PTSD n=5                                         | neuron      | W=0.9108 df=5 p=0.4727<br>W=0.8102 df=5 p=0.0978   | F=1.86 df1=1 df2=18 p=0.5625                 | Two-tailed unpaired t-test | t=1.261 df=8                | p=0.0229   | *       |            |                                                      |                         |       |                                  |                                  |                            |                             |            |      |                   |                                              |                         |                                           |                                                  |                               |                                  |                                  |                   |                             |            |                                          |                         |                                              |                                                  |                               |                                                  |                               |                            |               |            |                                             |                         |                                          |                                                  |                               |                                                  |                               |                            |                |             |                                                                |                         |                                             |                                                  |                               |                                                  |                               |                     |      |             |                                                               |                         |                                                                |                                                  |                               |                                                  |                               |                            |               |             |                                       |                         |                                                               |                                                  |                               |                                                  |                               |                            |               |             |                                     |                         |                                       |                                                 |                               |                                                  |                               |                     |     |             |                                                      |                         |                                     |                                                  |                               |                                                 |                               |                            |               |             |                                               |                         |                                                      |                                                  |                              |                                                  |                               |                            |               |             |                                                |                         |                                               |                                                  |                               |                                                  |                              |                            |              |             |                                                            |                                                                |                                                |                                                   |                               |                                                  |                               |                            |              |             |                                                            |                                                                 |                                                            |                                                                |                               |                                                   |                               |                            |               |             |                                                           |                                                               |                                                            |                                                                 |                               |                                                    |                               |                            |               |             |                                                           |                                                                |                                                           |                                                               |                              |                                                |                               |                            |               |             |                                                            |                                                                |                                                           |                                                                |                              |                                                   |                              |                            |                |             |                         |                                                             |                                                            |                                                                |                               |                                                  |                              |                            |                |             |                   |                                                             |                         |                                                             |                              |                                                    |                               |                            |                |             |              |                                                             |                   |                                                             |                               |                                                  |                              |                            |               |          |   |             |              |
| Figure S15C | sIPSC frequency between light on and light off                 | control n=5<br>PTSD n=5                                         | neuron      | W=0.8102 df=5 p=0.0978<br>W=0.7183 df=5 p=0.0147   | F=6.145 df1=1 df2=18 p=0.1066                | Two-tailed unpaired t-test | t=2.831 df=8                | p=0.0079   | **      |            |                                                      |                         |       |                                  |                                  |                            |                             |            |      |                   |                                              |                         |                                           |                                                  |                               |                                  |                                  |                   |                             |            |                                          |                         |                                              |                                                  |                               |                                                  |                               |                            |               |            |                                             |                         |                                          |                                                  |                               |                                                  |                               |                            |                |             |                                                                |                         |                                             |                                                  |                               |                                                  |                               |                     |      |             |                                                               |                         |                                                                |                                                  |                               |                                                  |                               |                            |               |             |                                       |                         |                                                               |                                                  |                               |                                                  |                               |                            |               |             |                                     |                         |                                       |                                                 |                               |                                                  |                               |                     |     |             |                                                      |                         |                                     |                                                  |                               |                                                 |                               |                            |               |             |                                               |                         |                                                      |                                                  |                              |                                                  |                               |                            |               |             |                                                |                         |                                               |                                                  |                               |                                                  |                              |                            |              |             |                                                            |                                                                |                                                |                                                   |                               |                                                  |                               |                            |              |             |                                                            |                                                                 |                                                            |                                                                |                               |                                                   |                               |                            |               |             |                                                           |                                                               |                                                            |                                                                 |                               |                                                    |                               |                            |               |             |                                                           |                                                                |                                                           |                                                               |                              |                                                |                               |                            |               |             |                                                            |                                                                |                                                           |                                                                |                              |                                                   |                              |                            |                |             |                         |                                                             |                                                            |                                                                |                               |                                                  |                              |                            |                |             |                   |                                                             |                         |                                                             |                              |                                                    |                               |                            |                |             |              |                                                             |                   |                                                             |                               |                                                  |                              |                            |               |          |   |             |              |
| Figure S16Q | Fluorescence intensity in FrA between sham and stimulation     | control n=6 slices from 3 mice<br>PTSD n=14 slices from 3 mice  | Slice       | W=0.9098 df=6 p=0.4349<br>W=0.9395 df=14 p=0.4119  | F=3.373 df1=1 df2=18 p=0.1874                | Two-tailed unpaired t-test | t=4.713 df=18               | p=0.0002   | ***     |            |                                                      |                         |       |                                  |                                  |                            |                             |            |      |                   |                                              |                         |                                           |                                                  |                               |                                  |                                  |                   |                             |            |                                          |                         |                                              |                                                  |                               |                                                  |                               |                            |               |            |                                             |                         |                                          |                                                  |                               |                                                  |                               |                            |                |             |                                                                |                         |                                             |                                                  |                               |                                                  |                               |                     |      |             |                                                               |                         |                                                                |                                                  |                               |                                                  |                               |                            |               |             |                                       |                         |                                                               |                                                  |                               |                                                  |                               |                            |               |             |                                     |                         |                                       |                                                 |                               |                                                  |                               |                     |     |             |                                                      |                         |                                     |                                                  |                               |                                                 |                               |                            |               |             |                                               |                         |                                                      |                                                  |                              |                                                  |                               |                            |               |             |                                                |                         |                                               |                                                  |                               |                                                  |                              |                            |              |             |                                                            |                                                                |                                                |                                                   |                               |                                                  |                               |                            |              |             |                                                            |                                                                 |                                                            |                                                                |                               |                                                   |                               |                            |               |             |                                                           |                                                               |                                                            |                                                                 |                               |                                                    |                               |                            |               |             |                                                           |                                                                |                                                           |                                                               |                              |                                                |                               |                            |               |             |                                                            |                                                                |                                                           |                                                                |                              |                                                   |                              |                            |                |             |                         |                                                             |                                                            |                                                                |                               |                                                  |                              |                            |                |             |                   |                                                             |                         |                                                             |                              |                                                    |                               |                            |                |             |              |                                                             |                   |                                                             |                               |                                                  |                              |                            |               |          |   |             |              |
| Figure S16Q | Fluorescence intensity in PrI between sham and stimulation     | control n=10 slices from 3 mice<br>PTSD n=16 slices from 3 mice | Slice       | W=0.7428 df=10 p=0.0029<br>W=0.9661 df=16 p=0.7113 | F=4.349 df1=1 df2=24 p=0.0313                | Two-tailed unpaired t-test | t=3.617 df=24               | p=0.0014   | **      |            |                                                      |                         |       |                                  |                                  |                            |                             |            |      |                   |                                              |                         |                                           |                                                  |                               |                                  |                                  |                   |                             |            |                                          |                         |                                              |                                                  |                               |                                                  |                               |                            |               |            |                                             |                         |                                          |                                                  |                               |                                                  |                               |                            |                |             |                                                                |                         |                                             |                                                  |                               |                                                  |                               |                     |      |             |                                                               |                         |                                                                |                                                  |                               |                                                  |                               |                            |               |             |                                       |                         |                                                               |                                                  |                               |                                                  |                               |                            |               |             |                                     |                         |                                       |                                                 |                               |                                                  |                               |                     |     |             |                                                      |                         |                                     |                                                  |                               |                                                 |                               |                            |               |             |                                               |                         |                                                      |                                                  |                              |                                                  |                               |                            |               |             |                                                |                         |                                               |                                                  |                               |                                                  |                              |                            |              |             |                                                            |                                                                |                                                |                                                   |                               |                                                  |                               |                            |              |             |                                                            |                                                                 |                                                            |                                                                |                               |                                                   |                               |                            |               |             |                                                           |                                                               |                                                            |                                                                 |                               |                                                    |                               |                            |               |             |                                                           |                                                                |                                                           |                                                               |                              |                                                |                               |                            |               |             |                                                            |                                                                |                                                           |                                                                |                              |                                                   |                              |                            |                |             |                         |                                                             |                                                            |                                                                |                               |                                                  |                              |                            |                |             |                   |                                                             |                         |                                                             |                              |                                                    |                               |                            |                |             |              |                                                             |                   |                                                             |                               |                                                  |                              |                            |               |          |   |             |              |
| Figure S16Q | Fluorescence intensity in S1 between sham and stimulation      | control n=6 slices from 3 mice<br>PTSD n=9 slices from 3 mice   | Slice       | W=0.956 df=6 p=0.7881<br>W=0.958 df=9 p=0.7777     | F=6.911 df1=1 df2=13 p=0.0477                | Two-tailed unpaired t-test | t=2.366 df=13               | p=0.0342   | *       |            |                                                      |                         |       |                                  |                                  |                            |                             |            |      |                   |                                              |                         |                                           |                                                  |                               |                                  |                                  |                   |                             |            |                                          |                         |                                              |                                                  |                               |                                                  |                               |                            |               |            |                                             |                         |                                          |                                                  |                               |                                                  |                               |                            |                |             |                                                                |                         |                                             |                                                  |                               |                                                  |                               |                     |      |             |                                                               |                         |                                                                |                                                  |                               |                                                  |                               |                            |               |             |                                       |                         |                                                               |                                                  |                               |                                                  |                               |                            |               |             |                                     |                         |                                       |                                                 |                               |                                                  |                               |                     |     |             |                                                      |                         |                                     |                                                  |                               |                                                 |                               |                            |               |             |                                               |                         |                                                      |                                                  |                              |                                                  |                               |                            |               |             |                                                |                         |                                               |                                                  |                               |                                                  |                              |                            |              |             |                                                            |                                                                |                                                |                                                   |                               |                                                  |                               |                            |              |             |                                                            |                                                                 |                                                            |                                                                |                               |                                                   |                               |                            |               |             |                                                           |                                                               |                                                            |                                                                 |                               |                                                    |                               |                            |               |             |                                                           |                                                                |                                                           |                                                               |                              |                                                |                               |                            |               |             |                                                            |                                                                |                                                           |                                                                |                              |                                                   |                              |                            |                |             |                         |                                                             |                                                            |                                                                |                               |                                                  |                              |                            |                |             |                   |                                                             |                         |                                                             |                              |                                                    |                               |                            |                |             |              |                                                             |                   |                                                             |                               |                                                  |                              |                            |               |          |   |             |              |
| Figure S16Q | Fluorescence intensity in M2 between sham and stimulation      | control n=10 slices from 3 mice<br>PTSD n=9 slices from 3 mice  | Slice       | W=0.9519 df=10 p=0.6915<br>W=0.8985 df=9 p=0.2435  | F=1.73 df1=1 df2=17 p=0.4309                 | Two-tailed unpaired t-test | t=0.8623 df=17              | p=0.4005   | ns      |            |                                                      |                         |       |                                  |                                  |                            |                             |            |      |                   |                                              |                         |                                           |                                                  |                               |                                  |                                  |                   |                             |            |                                          |                         |                                              |                                                  |                               |                                                  |                               |                            |               |            |                                             |                         |                                          |                                                  |                               |                                                  |                               |                            |                |             |                                                                |                         |                                             |                                                  |                               |                                                  |                               |                     |      |             |                                                               |                         |                                                                |                                                  |                               |                                                  |                               |                            |               |             |                                       |                         |                                                               |                                                  |                               |                                                  |                               |                            |               |             |                                     |                         |                                       |                                                 |                               |                                                  |                               |                     |     |             |                                                      |                         |                                     |                                                  |                               |                                                 |                               |                            |               |             |                                               |                         |                                                      |                                                  |                              |                                                  |                               |                            |               |             |                                                |                         |                                               |                                                  |                               |                                                  |                              |                            |              |             |                                                            |                                                                |                                                |                                                   |                               |                                                  |                               |                            |              |             |                                                            |                                                                 |                                                            |                                                                |                               |                                                   |                               |                            |               |             |                                                           |                                                               |                                                            |                                                                 |                               |                                                    |                               |                            |               |             |                                                           |                                                                |                                                           |                                                               |                              |                                                |                               |                            |               |             |                                                            |                                                                |                                                           |                                                                |                              |                                                   |                              |                            |                |             |                         |                                                             |                                                            |                                                                |                               |                                                  |                              |                            |                |             |                   |                                                             |                         |                                                             |                              |                                                    |                               |                            |                |             |              |                                                             |                   |                                                             |                               |                                                  |                              |                            |               |          |   |             |              |
| Figure S16Q | Fluorescence intensity in ACC between sham and stimulation     | control n=8 slices from 3 mice<br>PTSD n=10 slices from 3 mice  | Slice       | W=0.938 df=8 p=0.5918<br>W=0.9138 df=10 p=0.3084   | F=6.35 df1=1 df2=16 p=0.0235                 | Two-tailed unpaired t-test | t=0.7565 df=16              | p=0.4603   | ns      |            |                                                      |                         |       |                                  |                                  |                            |                             |            |      |                   |                                              |                         |                                           |                                                  |                               |                                  |                                  |                   |                             |            |                                          |                         |                                              |                                                  |                               |                                                  |                               |                            |               |            |                                             |                         |                                          |                                                  |                               |                                                  |                               |                            |                |             |                                                                |                         |                                             |                                                  |                               |                                                  |                               |                     |      |             |                                                               |                         |                                                                |                                                  |                               |                                                  |                               |                            |               |             |                                       |                         |                                                               |                                                  |                               |                                                  |                               |                            |               |             |                                     |                         |                                       |                                                 |                               |                                                  |                               |                     |     |             |                                                      |                         |                                     |                                                  |                               |                                                 |                               |                            |               |             |                                               |                         |                                                      |                                                  |                              |                                                  |                               |                            |               |             |                                                |                         |                                               |                                                  |                               |                                                  |                              |                            |              |             |                                                            |                                                                |                                                |                                                   |                               |                                                  |                               |                            |              |             |                                                            |                                                                 |                                                            |                                                                |                               |                                                   |                               |                            |               |             |                                                           |                                                               |                                                            |                                                                 |                               |                                                    |                               |                            |               |             |                                                           |                                                                |                                                           |                                                               |                              |                                                |                               |                            |               |             |                                                            |                                                                |                                                           |                                                                |                              |                                                   |                              |                            |                |             |                         |                                                             |                                                            |                                                                |                               |                                                  |                              |                            |                |             |                   |                                                             |                         |                                                             |                              |                                                    |                               |                            |                |             |              |                                                             |                   |                                                             |                               |                                                  |                              |                            |               |          |   |             |              |
| Figure S17H | Spine head max diameter                                        | control n=10 slices in 3 mice<br>PTSD n=11 slices in 3 mice     | Slice       | W=0.9405 df=10 p=0.5584<br>W=0.9308 df=11 p=0.4187 | F=3.552 df1=1 df2=19 p=0.0698                | Two-tailed unpaired t-test | t=0.4347 df=19              | p=0.6687   | ns      |            |                                                      |                         |       |                                  |                                  |                            |                             |            |      |                   |                                              |                         |                                           |                                                  |                               |                                  |                                  |                   |                             |            |                                          |                         |                                              |                                                  |                               |                                                  |                               |                            |               |            |                                             |                         |                                          |                                                  |                               |                                                  |                               |                            |                |             |                                                                |                         |                                             |                                                  |                               |                                                  |                               |                     |      |             |                                                               |                         |                                                                |                                                  |                               |                                                  |                               |                            |               |             |                                       |                         |                                                               |                                                  |                               |                                                  |                               |                            |               |             |                                     |                         |                                       |                                                 |                               |                                                  |                               |                     |     |             |                                                      |                         |                                     |                                                  |                               |                                                 |                               |                            |               |             |                                               |                         |                                                      |                                                  |                              |                                                  |                               |                            |               |             |                                                |                         |                                               |                                                  |                               |                                                  |                              |                            |              |             |                                                            |                                                                |                                                |                                                   |                               |                                                  |                               |                            |              |             |                                                            |                                                                 |                                                            |                                                                |                               |                                                   |                               |                            |               |             |                                                           |                                                               |                                                            |                                                                 |                               |                                                    |                               |                            |               |             |                                                           |                                                                |                                                           |                                                               |                              |                                                |                               |                            |               |             |                                                            |                                                                |                                                           |                                                                |                              |                                                   |                              |                            |                |             |                         |                                                             |                                                            |                                                                |                               |                                                  |                              |                            |                |             |                   |                                                             |                         |                                                             |                              |                                                    |                               |                            |                |             |              |                                                             |                   |                                                             |                               |                                                  |                              |                            |               |          |   |             |              |
| Figure S17I | Spine head volume                                              | control n=10 slices in 3 mice<br>PTSD n=11 slices in 3 mice     | Slice       | W=0.9514 df=8 p=0.6850<br>W=0.8972 df=7 p=0.1709   | F=4.42 df1=1 df2=19 p=0.0354                 | Two-tailed unpaired t-test | t=2.752 df=19               | p=0.0127   | *       |            |                                                      |                         |       |                                  |                                  |                            |                             |            |      |                   |                                              |                         |                                           |                                                  |                               |                                  |                                  |                   |                             |            |                                          |                         |                                              |                                                  |                               |                                                  |                               |                            |               |            |                                             |                         |                                          |                                                  |                               |                                                  |                               |                            |                |             |                                                                |                         |                                             |                                                  |                               |                                                  |                               |                     |      |             |                                                               |                         |                                                                |                                                  |                               |                                                  |                               |                            |               |             |                                       |                         |                                                               |                                                  |                               |                                                  |                               |                            |               |             |                                     |                         |                                       |                                                 |                               |                                                  |                               |                     |     |             |                                                      |                         |                                     |                                                  |                               |                                                 |                               |                            |               |             |                                               |                         |                                                      |                                                  |                              |                                                  |                               |                            |               |             |                                                |                         |                                               |                                                  |                               |                                                  |                              |                            |              |             |                                                            |                                                                |                                                |                                                   |                               |                                                  |                               |                            |              |             |                                                            |                                                                 |                                                            |                                                                |                               |                                                   |                               |                            |               |             |                                                           |                                                               |                                                            |                                                                 |                               |                                                    |                               |                            |               |             |                                                           |                                                                |                                                           |                                                               |                              |                                                |                               |                            |               |             |                                                            |                                                                |                                                           |                                                                |                              |                                                   |                              |                            |                |             |                         |                                                             |                                                            |                                                                |                               |                                                  |                              |                            |                |             |                   |                                                             |                         |                                                             |                              |                                                    |                               |                            |                |             |              |                                                             |                   |                                                             |                               |                                                  |                              |                            |               |          |   |             |              |
| Figure S17J | Spine volume                                                   | control n=10 slices in 3 mice<br>PTSD n=11 slices in 3 mice     | Slice       | W=0.9546 df=10 p=0.7227<br>W=0.9524 df=11 p=0.6748 | F=1.399 df1=1 df2=19 p=0.6248                | Two-tailed unpaired t-test | t=2.458 df=19               | p=0.0237   | *       |            |                                                      |                         |       |                                  |                                  |                            |                             |            |      |                   |                                              |                         |                                           |                                                  |                               |                                  |                                  |                   |                             |            |                                          |                         |                                              |                                                  |                               |                                                  |                               |                            |               |            |                                             |                         |                                          |                                                  |                               |                                                  |                               |                            |                |             |                                                                |                         |                                             |                                                  |                               |                                                  |                               |                     |      |             |                                                               |                         |                                                                |                                                  |                               |                                                  |                               |                            |               |             |                                       |                         |                                                               |                                                  |                               |                                                  |                               |                            |               |             |                                     |                         |                                       |                                                 |                               |                                                  |                               |                     |     |             |                                                      |                         |                                     |                                                  |                               |                                                 |                               |                            |               |             |                                               |                         |                                                      |                                                  |                              |                                                  |                               |                            |               |             |                                                |                         |                                               |                                                  |                               |                                                  |                              |                            |              |             |                                                            |                                                                |                                                |                                                   |                               |                                                  |                               |                            |              |             |                                                            |                                                                 |                                                            |                                                                |                               |                                                   |                               |                            |               |             |                                                           |                                                               |                                                            |                                                                 |                               |                                                    |                               |                            |               |             |                                                           |                                                                |                                                           |                                                               |                              |                                                |                               |                            |               |             |                                                            |                                                                |                                                           |                                                                |                              |                                                   |                              |                            |                |             |                         |                                                             |                                                            |                                                                |                               |                                                  |                              |                            |                |             |                   |                                                             |                         |                                                             |                              |                                                    |                               |                            |                |             |              |                                                             |                   |                                                             |                               |                                                  |                              |                            |               |          |   |             |              |

**Table S2. Quantification data for PoM neurons manipulated in the experiments.**

| Quantification data for PoM neurons manipulated in the experiments |                    |             |       |          |                   |             |       |
|--------------------------------------------------------------------|--------------------|-------------|-------|----------|-------------------|-------------|-------|
| Figure                                                             | PoM                | cell number |       | Figure   | TNR               | cell number |       |
|                                                                    |                    | left        | right |          |                   | left        | right |
| Figure 3                                                           | Control-eGFP-1     | 441         | 368   | Figure 5 | PTSD-eYFP-1       | 203         | 429   |
| Figure 3                                                           | Control-eGFP-2     | 182         | 202   | Figure 5 | PTSD-eYFP-2       | 446         | 498   |
| Figure 3                                                           | Control-eGFP-3     | 225         | 314   | Figure 5 | PTSD-eYFP-3       | 317         | 255   |
| Figure 3                                                           | Control-eGFP-4     | 227         | 365   | Figure 5 | PTSD-eYFP-4       | 331         | 248   |
| Figure 3                                                           | Control-eGFP-5     | 586         | 396   | Figure 5 | PTSD-eYFP-5       | 305         | 297   |
| Figure 3                                                           | Control-eGFP-6     | 332         | 285   | Figure 5 | PTSD-eYFP-6       | 331         | 305   |
| Figure 3                                                           | Control-eGFP-7     | 265         | 224   | Figure 5 | control-eYFP-1    | 321         | 288   |
| Figure 3                                                           | Control-eGFP-8     | 283         | 302   | Figure 5 | control-eYFP-2    | 445         | 467   |
| Figure 3                                                           | Control-eGFP-9     | 266         | 312   | Figure 5 | control-eYFP-3    | 399         | 428   |
| Figure 3                                                           | Control-eGFP-10    | 374         | 402   | Figure 5 | control-eYFP-4    | 433         | 418   |
| Figure 3                                                           | PTSD-eGFP-1        | 227         | 334   | Figure 5 | control-eYFP-5    | 447         | 469   |
| Figure 3                                                           | PTSD-eGFP-2        | 265         | 343   | Figure 5 | control-eYFP-6    | 454         | 437   |
| Figure 3                                                           | PTSD-eGFP-3        | 373         | 196   | Figure 5 | PTSD-SSFO-1       | 441         | 396   |
| Figure 3                                                           | PTSD-eGFP-4        | 165         | 294   | Figure 5 | PTSD-SSFO-2       | 296         | 365   |
| Figure 3                                                           | PTSD-eGFP-5        | 199         | 261   | Figure 5 | PTSD-SSFO-3       | 331         | 453   |
| Figure 3                                                           | PTSD-eGFP-6        | 234         | 479   | Figure 5 | PTSD-SSFO-4       | 361         | 378   |
| Figure 3                                                           | PTSD-eGFP-7        | 336         | 452   | Figure 5 | PTSD-SSFO-5       | 412         | 388   |
| Figure 3                                                           | PTSD-Kir2.1-1      | 415         | 182   | Figure 5 | PTSD-SSFO-6       | 318         | 386   |
| Figure 3                                                           | PTSD-Kir2.1-2      | 383         | 302   | Figure 5 | PTSD-SSFO-7       | 279         | 345   |
| Figure 3                                                           | PTSD-Kir2.1-3      | 241         | 293   | Figure 5 | PTSD-SSFO-8       | 336         | 367   |
| Figure 3                                                           | PTSD-Kir2.1-4      | 119         | 434   | Figure 5 | Control-mCherry-1 | 105         | 97    |
| Figure 3                                                           | PTSD-Kir2.1-5      | 285         | 221   | Figure 5 | Control-mCherry-2 | 106         | 174   |
| Figure 3                                                           | PTSD-Kir2.1-6      | 334         | 286   | Figure 5 | Control-mCherry-3 | 231         | 174   |
| Figure 3                                                           | PTSD-Kir2.1-7      | 281         | 314   | Figure 5 | Control-mCherry-4 | 94          | 186   |
| Figure 3                                                           | control-mcherry-1  | 196         | 241   | Figure 5 | Control-mCherry-5 | 261         | 177   |
| Figure 3                                                           | control-mcherry-2  | 264         | 331   | Figure 5 | Control-mCherry-6 | 195         | 167   |
| Figure 3                                                           | control-mcherry-3  | 222         | 219   | Figure 5 | PTSD-mCherry-1    | 225         | 196   |
| Figure 3                                                           | control-mcherry-4  | 316         | 273   | Figure 5 | PTSD-mCherry-2    | 165         | 118   |
| Figure 3                                                           | control-mcherry-5  | 326         | 296   | Figure 5 | PTSD-mCherry-3    | 233         | 199   |
| Figure 3                                                           | control-mcherry-6  | 221         | 162   | Figure 5 | PTSD-mCherry-4    | 105         | 67    |
| Figure 3                                                           | control-mcherry-7  | 194         | 225   | Figure 5 | PTSD-mCherry-5    | 105         | 173   |
| Figure 3                                                           | control-mcherry-8  | 203         | 313   | Figure 5 | PTSD-mCherry-6    | 157         | 106   |
| Figure 3                                                           | control-mcherry-9  | 334         | 296   | Figure 5 | PTSD-mCherry-7    | 178         | 164   |
| Figure 3                                                           | control-mcherry-10 | 345         | 217   | Figure 5 | PTSD-hM3D(Gq)-1   | 142         | 113   |
| Figure 3                                                           | PTSD-mcherry-1     | 297         | 332   | Figure 5 | PTSD-hM3D(Gq)-2   | 133         | 175   |
| Figure 3                                                           | PTSD-mcherry-2     | 278         | 321   | Figure 5 | PTSD-hM3D(Gq)-3   | 152         | 151   |
| Figure 3                                                           | PTSD-mcherry-3     | 257         | 196   | Figure 5 | PTSD-hM3D(Gq)-4   | 72          | 122   |
| Figure 3                                                           | PTSD-mcherry-4     | 264         | 354   | Figure 5 | PTSD-hM3D(Gq)-5   | 84          | 106   |
| Figure 3                                                           | PTSD-mcherry-5     | 355         | 401   | Figure 5 | PTSD-hM3D(Gq)-6   | 138         | 170   |
| Figure 3                                                           | PTSD-mcherry-6     | 223         | 312   | Figure 5 | PTSD-hM3D(Gq)-7   | 182         | 141   |
| Figure 3                                                           | PTSD-hM4D(Gi)-1    | 284         | 176   | Figure 5 | PTSD-hM3D(Gq)-8   | 102         | 144   |
| Figure 3                                                           | PTSD-hM4D(Gi)-2    | 265         | 239   |          |                   |             |       |
| Figure 3                                                           | PTSD-hM4D(Gi)-3    | 284         | 327   |          |                   |             |       |
| Figure 3                                                           | PTSD-hM4D(Gi)-4    | 266         | 317   |          |                   |             |       |
| Figure 3                                                           | PTSD-hM4D(Gi)-5    | 321         | 331   |          |                   |             |       |
| Figure 3                                                           | PTSD-hM4D(Gi)-6    | 336         | 402   |          |                   |             |       |
| Figure 5                                                           | Control-mcherry-1  | 121         | 143   |          |                   |             |       |
| Figure 5                                                           | Control-mcherry-2  | 197         | 265   |          |                   |             |       |
| Figure 5                                                           | Control-mcherry-3  | 135         | 176   |          |                   |             |       |
| Figure 5                                                           | Control-mcherry-4  | 244         | 231   |          |                   |             |       |
| Figure 5                                                           | Control-mcherry-5  | 263         | 287   |          |                   |             |       |
| Figure 5                                                           | Control-mcherry-6  | 196         | 346   |          |                   |             |       |
| Figure 5                                                           | PTSD-mcherry-1     | 221         | 169   |          |                   |             |       |
| Figure 5                                                           | PTSD-mcherry-2     | 278         | 265   |          |                   |             |       |
| Figure 5                                                           | PTSD-mcherry-3     | 179         | 264   |          |                   |             |       |
| Figure 5                                                           | PTSD-mcherry-4     | 297         | 104   |          |                   |             |       |
| Figure 5                                                           | PTSD-mcherry-5     | 268         | 298   |          |                   |             |       |
| Figure 5                                                           | PTSD-mcherry-6     | 243         | 268   |          |                   |             |       |
| Figure 5                                                           | PTSD-mcherry-7     | 261         | 213   |          |                   |             |       |
| Figure 5                                                           | PTSD-hM3D(Gq)-1    | 417         | 396   |          |                   |             |       |
| Figure 5                                                           | PTSD-hM3D(Gq)-2    | 214         | 275   |          |                   |             |       |
| Figure 5                                                           | PTSD-hM3D(Gq)-3    | 146         | 385   |          |                   |             |       |
| Figure 5                                                           | PTSD-hM3D(Gq)-4    | 253         | 283   |          |                   |             |       |
| Figure 5                                                           | PTSD-hM3D(Gq)-5    | 292         | 143   |          |                   |             |       |
| Figure 5                                                           | PTSD-hM3D(Gq)-6    | 256         | 281   |          |                   |             |       |
| Figure 5                                                           | PTSD-hM3D(Gq)-7    | 182         | 201   |          |                   |             |       |
| Figure 5                                                           | PTSD-hM3D(Gq)-8    | 283         | 266   |          |                   |             |       |

| Quantification data for PoM neurons manipulated in the experiments |                |             |       |        |     |             |       |
|--------------------------------------------------------------------|----------------|-------------|-------|--------|-----|-------------|-------|
| Figure                                                             | PoM            | cell number |       | Figure | TNR | cell number |       |
|                                                                    |                | left        | right |        |     | left        | right |
| Figure 7                                                           | Control-eYFP-1 | 176         | 368   |        |     |             |       |
| Figure 7                                                           | Control-eYFP-2 | 227         | 231   |        |     |             |       |
| Figure 7                                                           | Control-eYFP-3 | 406         | 277   |        |     |             |       |
| Figure 7                                                           | Control-eYFP-4 | 365         | 377   |        |     |             |       |
| Figure 7                                                           | Control-eYFP-5 | 173         | 113   |        |     |             |       |
| Figure 7                                                           | Control-eYFP-6 | 268         | 289   |        |     |             |       |
| Figure 7                                                           | Control-eYFP-7 | 223         | 331   |        |     |             |       |
| Figure 7                                                           | Control-eYFP-8 | 278         | 321   |        |     |             |       |
| Figure 7                                                           | PTSD-eYFP-1    | 365         | 272   |        |     |             |       |
| Figure 7                                                           | PTSD-eYFP-2    | 297         | 286   |        |     |             |       |
| Figure 7                                                           | PTSD-eYFP-3    | 665         | 387   |        |     |             |       |
| Figure 7                                                           | PTSD-eYFP-4    | 423         | 344   |        |     |             |       |
| Figure 7                                                           | PTSD-eYFP-5    | 512         | 466   |        |     |             |       |
| Figure 7                                                           | PTSD-eYFP-6    | 279         | 211   |        |     |             |       |
| Figure 7                                                           | PTSD-eYFP-7    | 334         | 297   |        |     |             |       |
| Figure 7                                                           | PTSD-eYFP-8    | 361         | 301   |        |     |             |       |
| Figure 7                                                           | PTSD-eYFP-9    | 336         | 299   |        |     |             |       |
| Figure 7                                                           | PTSD-eNpHR-1   | 273         | 305   |        |     |             |       |
| Figure 7                                                           | PTSD-eNpHR-2   | 261         | 173   |        |     |             |       |
| Figure 7                                                           | PTSD-eNpHR-3   | 449         | 483   |        |     |             |       |
| Figure 7                                                           | PTSD-eNpHR-4   | 301         | 421   |        |     |             |       |
| Figure 7                                                           | PTSD-eNpHR-5   | 291         | 341   |        |     |             |       |
| Figure 7                                                           | PTSD-eNpHR-6   | 406         | 378   |        |     |             |       |
| Figure 7                                                           | PTSD-eNpHR-7   | 278         | 336   |        |     |             |       |
| Figure 7                                                           | PTSD-eNpHR-8   | 325         | 296   |        |     |             |       |

**Table S3. Antibodies list.**

| <b>Antibodies</b>          |                  |                                 |
|----------------------------|------------------|---------------------------------|
| <b>REAGENT or RESOURCE</b> | <b>SOURCE</b>    | <b>IDENTIFIER</b>               |
| Mouse anti-MAP2            | Sigma-Aldrich    | Cat#M3696; RRID: AB_1840999     |
| Rabbit anti-Arc            | Synaptic Systems | Cat#156 003; RRID: AB_887694    |
| Rabbit anti-NeuN           | Sigma-Aldrich    | Cat#ABN78; RRID:AB_10807945     |
| Goat anti-rabbit 488       | Invitrogen       | Cat# ab150077; RRID:AB_2630356  |
| Goat anti-mouse 594        | Invitrogen       | Cat#R37121; RRID: AB_2556549    |
| Goat anti-rabbit 647       | Jackson          | Cat# ab150083; RRID: AB_2714032 |

**Supplementary Movie S1.** Representative video showing the defensive behaviors of control and PTSD mice provoked by a whisker stimulation.
